# Supplementary material for: Gene expression profiling in circulating endothelial cells from systemic sclerosis patients shows an altered control of apoptosis and angiogenesis that is modified by iloprost infusion
Source: Arthritis Res Ther. 2010 Jul 7;12(4):R131. doi: 10.1186/ar3069 (PMC2945021; doi:10.1186/ar3069)
Supplement: Additional file 5 — Genes modulated in SSc patients without ulcers compared to healthy donors. Fold change values obtained from the comparison between the expression levels of genes in circulating endothelial cells of patients without ulcers and those of healthy donors. [file ar3069-S5.XLS]

## Sheet: baseline bg
Fold change of genes modulated in SSc patients without ulcers compared to healthy donors
Probe Set ID	Gene Title	Gene Symbol	FCAbsolute([SSc] Vs [healthy])	regulation ([SSc] Vs [healthy])
1007_s_at	discoidin domain receptor family, member 1	DDR1	8.16702	down
1053_at	replication factor C (activator 1) 2, 40kDa	RFC2	2.74905	down
117_at	heat shock 70kDa protein 6 (HSP70B') /// similar to heat shock 70kDa protein 6 (HSP70B)	HSPA6 /// LOC652878	1.94118	down
121_at	paired box gene 8	PAX8	1.06285	down
1255_g_at	guanylate cyclase activator 1A (retina)	GUCA1A	2.44809	up
1294_at	ubiquitin-activating enzyme E1-like	UBE1L	1.86141	down
1316_at	thyroid hormone receptor, alpha (erythroblastic leukemia viral (v-erb-a) oncogene homolog, avian)	THRA	1.06036	down
1320_at	protein tyrosine phosphatase, non-receptor type 21	PTPN21	3.07006	down
1405_i_at	chemokine (C-C motif) ligand 5	CCL5	57.7521	up
1431_at	cytochrome P450, family 2, subfamily E, polypeptide 1	CYP2E1	1.92776	up
1438_at	EPH receptor B3	EPHB3	3.17583	up
1487_at	estrogen-related receptor alpha	ESRRA	2.00334	down
1494_f_at	cytochrome P450, family 2, subfamily A, polypeptide 6	CYP2A6	1.46436	up
1598_g_at	growth arrest-specific 6	GAS6	10.6501	down
160020_at	matrix metallopeptidase 14 (membrane-inserted)	MMP14	1.27876	up
1729_at	TNFRSF1A-associated via death domain	TRADD	2.4936	down
177_at	phospholipase D1, phosphatidylcholine-specific	PLD1	2.77242	down
1773_at	farnesyltransferase, CAAX box, beta	FNTB	1.45939	up
179_at	postmeiotic segregation increased 2-like 11	PMS2L11	1.40149	up
1861_at	BCL2-antagonist of cell death	BAD	1.01134	up
200000_s_at	PRP8 pre-mRNA processing factor 8 homolog (S. cerevisiae) /// PRP8 pre-mRNA processing factor 8 homolog (S. cerevisiae)	PRPF8	8.40926	down
200001_at	calpain, small subunit 1 /// calpain, small subunit 1	CAPNS1	2.81541	down
200002_at	ribosomal protein L35 /// ribosomal protein L35	RPL35	5.71814	down
200003_s_at	ribosomal protein L28 /// ribosomal protein L28	RPL28	4.21668	down
200004_at	eukaryotic translation initiation factor 4 gamma, 2 /// eukaryotic translation initiation factor 4 gamma, 2	EIF4G2	3.09548	down
200005_at	eukaryotic translation initiation factor 3, subunit 7 zeta, 66/67kDa /// eukaryotic translation initiation factor 3, subunit 7 zeta, 66/67kDa	EIF3S7	4.68147	down
200006_at	Parkinson disease (autosomal recessive, early onset) 7 /// Parkinson disease (autosomal recessive, early onset) 7	PARK7	2.8539	down
200007_at	signal recognition particle 14kDa (homologous Alu RNA binding protein) /// signal recognition particle 14kDa (homologous Alu RNA binding protein)	SRP14	4.91733	down
200008_s_at	GDP dissociation inhibitor 2 /// GDP dissociation inhibitor 2	GDI2	3.08503	down
200009_at	GDP dissociation inhibitor 2 /// GDP dissociation inhibitor 2	GDI2	5.8279	down
200010_at	Ribosomal protein L11 /// Ribosomal protein L11	RPL11	2.26502	down
200011_s_at	ADP-ribosylation factor 3 /// ADP-ribosylation factor 3	ARF3	2.13686	down
200012_x_at	ribosomal protein L21 /// ribosomal protein L21 /// similar to 60S ribosomal protein L21 /// similar to 60S ribosomal protein L21 /// similar to ribosomal protein L21 isoform 1 /// similar to ribosomal protein L21 isoform 1 /// similar to 60S ribosomal protein L21 /// similar to 60S ribosomal protein L21 /// similar to ribosomal protein L21 isoform 1 /// similar to ribosomal protein L21 isoform 1	RPL21 /// LOC653156 /// LOC653713 /// LOC653730 /// LOC653737	1.12411	down
200013_at	ribosomal protein L24 /// ribosomal protein L24	RPL24	4.95624	down
200014_s_at	heterogeneous nuclear ribonucleoprotein C (C1/C2) /// heterogeneous nuclear ribonucleoprotein C (C1/C2)	HNRPC	5.32118	down
200015_s_at	septin 2 /// septin 2	2008-09-02	5.37636	down
200016_x_at	heterogeneous nuclear ribonucleoprotein A1 /// heterogeneous nuclear ribonucleoprotein A1	HNRPA1	4.74683	down
200017_at	ribosomal protein S27a /// ribosomal protein S27a	RPS27A	3.24247	down
200018_at	ribosomal protein S13 /// ribosomal protein S13	RPS13	2.82841	down
200019_s_at	Finkel-Biskis-Reilly murine sarcoma virus (FBR-MuSV) ubiquitously expressed (fox derived); ribosomal protein S30 /// Finkel-Biskis-Reilly murine sarcoma virus (FBR-MuSV) ubiquitously expressed (fox derived); ribosomal protein S30	FAU	2.92887	down
200020_at	TAR DNA binding protein /// TAR DNA binding protein	TARDBP	9.09377	down
200021_at	cofilin 1 (non-muscle) /// cofilin 1 (non-muscle)	CFL1	1.53774	down
200022_at	ribosomal protein L18 /// ribosomal protein L18	RPL18	4.47043	down
200023_s_at	eukaryotic translation initiation factor 3, subunit 5 epsilon, 47kDa /// eukaryotic translation initiation factor 3, subunit 5 epsilon, 47kDa	EIF3S5	4.29926	down
200024_at	ribosomal protein S5 /// ribosomal protein S5	RPS5	5.57191	down
200025_s_at	ribosomal protein L27 /// ribosomal protein L27	RPL27	4.07889	down
200026_at	ribosomal protein L34 /// ribosomal protein L34 /// similar to ribosomal protein L34 /// similar to ribosomal protein L34 /// similar to ribosomal protein L34 /// similar to ribosomal protein L34	RPL34 /// LOC342994 /// LOC651249	4.75321	down
200027_at	asparaginyl-tRNA synthetase /// asparaginyl-tRNA synthetase	NARS	4.88594	down
200028_s_at	START domain containing 7 /// START domain containing 7	STARD7	5.40936	down
200029_at	ribosomal protein L19 /// ribosomal protein L19	RPL19	4.80926	down
200030_s_at	solute carrier family 25 (mitochondrial carrier; phosphate carrier), member 3 /// solute carrier family 25 (mitochondrial carrier; phosphate carrier), member 3	SLC25A3	4.45879	down
200031_s_at	ribosomal protein S11 /// ribosomal protein S11	RPS11	1.6876	down
200032_s_at	ribosomal protein L9 /// ribosomal protein L9	RPL9	3.32215	down
200033_at	DEAD (Asp-Glu-Ala-Asp) box polypeptide 5 /// DEAD (Asp-Glu-Ala-Asp) box polypeptide 5	DDX5	3.96759	down
200034_s_at	ribosomal protein L6 /// ribosomal protein L6	RPL6	4.84325	down
200035_at	dullard homolog (Xenopus laevis) /// dullard homolog (Xenopus laevis)	DULLARD	1.68015	down
200036_s_at	ribosomal protein L10a /// ribosomal protein L10a	RPL10A	8.04113	down
200037_s_at	chromobox homolog 3 (HP1 gamma homolog, Drosophila) /// chromobox homolog 3 (HP1 gamma homolog, Drosophila) /// similar to chromobox homolog 3 /// similar to chromobox homolog 3	CBX3 /// LOC653972	4.41613	down
200038_s_at	ribosomal protein L17 /// ribosomal protein L17	RPL17	5.49867	down
200039_s_at	proteasome (prosome, macropain) subunit, beta type, 2 /// proteasome (prosome, macropain) subunit, beta type, 2	PSMB2	6.5022	down
200040_at	KH domain containing, RNA binding, signal transduction associated 1 /// KH domain containing, RNA binding, signal transduction associated 1	KHDRBS1	7.25427	down
200041_s_at	HLA-B associated transcript 1 /// HLA-B associated transcript 1	BAT1	5.12786	down
200042_at	hypothetical protein HSPC117 /// hypothetical protein HSPC117	HSPC117	7.26034	down
200043_at	enhancer of rudimentary homolog (Drosophila) /// enhancer of rudimentary homolog (Drosophila)	ERH	8.93773	down
200044_at	splicing factor, arginine/serine-rich 9 /// splicing factor, arginine/serine-rich 9	SFRS9	5.71094	down
200045_at	ATP-binding cassette, sub-family F (GCN20), member 1 /// ATP-binding cassette, sub-family F (GCN20), member 1	ABCF1	1.92216	down
200046_at	defender against cell death 1 /// defender against cell death 1	DAD1	2.79761	down
200047_s_at	YY1 transcription factor /// YY1 transcription factor	YY1	2.23926	down
200048_s_at	jumping translocation breakpoint /// jumping translocation breakpoint	JTB	1.75014	down
200049_at	MYST histone acetyltransferase 2 /// MYST histone acetyltransferase 2	MYST2	1.27451	down
200050_at	zinc finger protein 146 /// zinc finger protein 146	ZNF146	9.63188	down
200051_at	squamous cell carcinoma antigen recognised by T cells /// squamous cell carcinoma antigen recognised by T cells	SART1	1.0454	up
200052_s_at	interleukin enhancer binding factor 2, 45kDa /// interleukin enhancer binding factor 2, 45kDa	ILF2	11.6849	down
200053_at	sperm associated antigen 7 /// sperm associated antigen 7	SPAG7	6.10861	down
200054_at	zinc finger protein 259 /// zinc finger protein 259	ZNF259	7.25171	down
200055_at	TAF10 RNA polymerase II, TATA box binding protein (TBP)-associated factor, 30kDa /// TAF10 RNA polymerase II, TATA box binding protein (TBP)-associated factor, 30kDa	TAF10	1.25302	down
200056_s_at	nuclear DNA-binding protein /// nuclear DNA-binding protein	C1D	2.77048	down
200057_s_at	non-POU domain containing, octamer-binding /// non-POU domain containing, octamer-binding	NONO	7.32165	down
200058_s_at	activating signal cointegrator 1 complex subunit 3-like 1 /// activating signal cointegrator 1 complex subunit 3-like 1	ASCC3L1	4.48781	down
200059_s_at	ras homolog gene family, member A /// ras homolog gene family, member A	RHOA	2.7191	down
200060_s_at	RNA binding protein S1, serine-rich domain /// RNA binding protein S1, serine-rich domain	RNPS1	3.48729	down
200061_s_at	ribosomal protein S24 /// ribosomal protein S24	RPS24	3.83732	down
200062_s_at	ribosomal protein L30 /// ribosomal protein L30	RPL30	2.38151	down
200063_s_at	nucleophosmin (nucleolar phosphoprotein B23, numatrin) /// nucleophosmin (nucleolar phosphoprotein B23, numatrin)	NPM1	11.6785	down
200064_at	heat shock protein 90kDa alpha (cytosolic), class B member 1 /// heat shock protein 90kDa alpha (cytosolic), class B member 1	HSP90AB1	1.68972	down
200065_s_at	ADP-ribosylation factor 1 /// ADP-ribosylation factor 1	ARF1	1.09826	down
200066_at	IK cytokine, down-regulator of HLA II /// IK cytokine, down-regulator of HLA II	IK	4.07021	down
200067_x_at	sorting nexin 3 /// sorting nexin 3	SNX3	1.17271	up
200068_s_at	calnexin /// calnexin	CANX	10.8804	down
200069_at	squamous cell carcinoma antigen recognised by T cells 3 /// squamous cell carcinoma antigen recognised by T cells 3	SART3	7.41434	down
200070_at	chromosome 2 open reading frame 24 /// chromosome 2 open reading frame 24	C2orf24	1.66556	up
200071_at	survival motor neuron domain containing 1 /// survival motor neuron domain containing 1	SMNDC1	4.96643	down
200072_s_at	heterogeneous nuclear ribonucleoprotein M /// heterogeneous nuclear ribonucleoprotein M	HNRPM	11.5018	down
200073_s_at	heterogeneous nuclear ribonucleoprotein D (AU-rich element RNA binding protein 1, 37kDa) /// heterogeneous nuclear ribonucleoprotein D (AU-rich element RNA binding protein 1, 37kDa)	HNRPD	3.59331	down
200074_s_at	ribosomal protein L14 /// ribosomal protein L14 /// ribosomal protein L14-like /// ribosomal protein L14-like /// similar to 60S ribosomal protein L14 (CAG-ISL 7) /// similar to 60S ribosomal protein L14 (CAG-ISL 7)	RPL14 /// RPL14L /// LOC649821	5.06838	down
200075_s_at	guanylate kinase 1 /// guanylate kinase 1	GUK1	2.25673	up
200076_s_at	hypothetical protein MGC2749 /// hypothetical protein MGC2749	MGC2749	1.27043	down
200077_s_at	ornithine decarboxylase antizyme 1 /// ornithine decarboxylase antizyme 1	OAZ1	1.37403	up
200078_s_at	ATPase, H+ transporting, lysosomal 21kDa, V0 subunit b /// ATPase, H+ transporting, lysosomal 21kDa, V0 subunit b	ATP6V0B	1.82454	down
200079_s_at	lysyl-tRNA synthetase /// lysyl-tRNA synthetase	KARS	2.77798	down
200080_s_at	H3 histone, family 3A /// H3 histone, family 3A /// H3 histone, family 3A pseudogene /// H3 histone, family 3A pseudogene /// similar to H3 histone, family 3B /// similar to H3 histone, family 3B	H3F3A /// LOC440926 /// LOC644914	1.15014	down
200081_s_at	ribosomal protein S6 /// ribosomal protein S6	RPS6	4.26195	down
200082_s_at	ribosomal protein S7 /// ribosomal protein S7	RPS7	3.9253	down
200083_at	ubiquitin specific peptidase 22 /// ubiquitin specific peptidase 22	USP22	4.83794	down
200084_at	chromosome 11 open reading frame 58 /// chromosome 11 open reading frame 58	C11orf58	2.99721	down
200085_s_at	transcription elongation factor B (SIII), polypeptide 2 (18kDa, elongin B) /// transcription elongation factor B (SIII), polypeptide 2 (18kDa, elongin B)	TCEB2	1.22626	up
200086_s_at	cytochrome c oxidase subunit IV isoform 1 /// cytochrome c oxidase subunit IV isoform 1	COX4I1	2.64814	down
200087_s_at	transmembrane emp24 domain trafficking protein 2 /// transmembrane emp24 domain trafficking protein 2	TMED2	8.41693	down
200088_x_at	ribosomal protein L12 /// ribosomal protein L12	RPL12	2.99327	down
200089_s_at	ribosomal protein L4 /// ribosomal protein L4	RPL4	2.97231	down
200090_at	farnesyltransferase, CAAX box, alpha /// farnesyltransferase, CAAX box, alpha	FNTA	9.67446	down
200091_s_at	ribosomal protein S25 /// ribosomal protein S25	RPS25	3.06778	down
200092_s_at	ribosomal protein L37 /// ribosomal protein L37	RPL37	2.84163	down
200093_s_at	histidine triad nucleotide binding protein 1 /// histidine triad nucleotide binding protein 1	HINT1	4.73694	down
200094_s_at	eukaryotic translation elongation factor 2 /// eukaryotic translation elongation factor 2	EEF2	3.37269	down
200095_x_at	ribosomal protein S10 /// ribosomal protein S10	RPS10	2.92609	down
200096_s_at	ATPase, H+ transporting, lysosomal 9kDa, V0 subunit e /// ATPase, H+ transporting, lysosomal 9kDa, V0 subunit e	ATP6V0E	2.26616	down
200097_s_at	heterogeneous nuclear ribonucleoprotein K /// heterogeneous nuclear ribonucleoprotein K	HNRPK	2.0532	down
200098_s_at	anaphase promoting complex subunit 5 /// anaphase promoting complex subunit 5	ANAPC5	2.04602	down
200099_s_at	ribosomal protein S3A /// ribosomal protein S3A /// similar to ribosomal protein S3a /// similar to ribosomal protein S3a	RPS3A /// LOC439992	3.16161	down
200593_s_at	heterogeneous nuclear ribonucleoprotein U (scaffold attachment factor A)	HNRPU	9.61143	down
200594_x_at	heterogeneous nuclear ribonucleoprotein U (scaffold attachment factor A)	HNRPU	7.66337	down
200595_s_at	eukaryotic translation initiation factor 3, subunit 10 theta, 150/170kDa	EIF3S10	3.91137	down
200596_s_at	eukaryotic translation initiation factor 3, subunit 10 theta, 150/170kDa	EIF3S10	5.12043	down
200597_at	eukaryotic translation initiation factor 3, subunit 10 theta, 150/170kDa	EIF3S10	1.5927	down
200598_s_at	heat shock protein 90kDa beta (Grp94), member 1	HSP90B1	7.00026	down
200599_s_at	heat shock protein 90kDa beta (Grp94), member 1	HSP90B1	17.8132	down
200600_at	moesin	MSN	2.32723	down
200601_at	actinin, alpha 4	ACTN4	7.9303	down
200602_at	amyloid beta (A4) precursor protein (peptidase nexin-II, Alzheimer disease)	APP	9.52587	down
200603_at	protein kinase, cAMP-dependent, regulatory, type I, alpha (tissue specific extinguisher 1)	PRKAR1A	2.53001	down
200604_s_at	protein kinase, cAMP-dependent, regulatory, type I, alpha (tissue specific extinguisher 1)	PRKAR1A	2.55924	down
200605_s_at	protein kinase, cAMP-dependent, regulatory, type I, alpha (tissue specific extinguisher 1)	PRKAR1A	3.12484	down
200606_at	desmoplakin	DSP	13.097	down
200607_s_at	RAD21 homolog (S. pombe)	RAD21	1.83633	down
200608_s_at	RAD21 homolog (S. pombe)	RAD21	5.82582	down
200609_s_at	WD repeat domain 1	WDR1	2.08989	down
200610_s_at	nucleolin	NCL	6.77182	down
200611_s_at	WD repeat domain 1	WDR1	2.47023	down
200612_s_at	adaptor-related protein complex 2, beta 1 subunit	AP2B1	2.14333	down
200613_at	adaptor-related protein complex 2, mu 1 subunit	AP2M1	1.07755	down
200614_at	clathrin, heavy polypeptide (Hc)	CLTC	6.45905	down
200615_s_at	adaptor-related protein complex 2, beta 1 subunit	AP2B1	1.08975	up
200616_s_at	KIAA0152	KIAA0152	1.41655	up
200617_at	KIAA0152	KIAA0152	2.16792	down
200618_at	LIM and SH3 protein 1	LASP1	3.49177	down
200619_at	splicing factor 3b, subunit 2, 145kDa	SF3B2	6.6673	down
200620_at	transmembrane protein 59	TMEM59	2.93613	down
200621_at	cysteine and glycine-rich protein 1	CSRP1	16.8815	down
200622_x_at	calmodulin 3 (phosphorylase kinase, delta)	CALM3	3.83132	up
200623_s_at	calmodulin 3 (phosphorylase kinase, delta)	CALM3	1.29192	up
200624_s_at	matrin 3	MATR3	4.9734	down
200625_s_at	CAP, adenylate cyclase-associated protein 1 (yeast)	CAP1	1.90428	down
200626_s_at	matrin 3	MATR3	6.30294	down
200627_at	prostaglandin E synthase 3 (cytosolic)	PTGES3	1.50252	down
200628_s_at	tryptophanyl-tRNA synthetase	WARS	9.07586	down
200629_at	tryptophanyl-tRNA synthetase	WARS	7.02504	down
200630_x_at	SET translocation (myeloid leukemia-associated)	SET	6.12252	down
200631_s_at	SET translocation (myeloid leukemia-associated)	SET	10.3427	down
200632_s_at	N-myc downstream regulated gene 1	NDRG1	11.4286	down
200633_at	ubiquitin B /// ubiquitin B	UBB	1.38546	up
200634_at	profilin 1	PFN1	2.38652	down
200635_s_at	protein tyrosine phosphatase, receptor type, F	PTPRF	21.3489	down
200636_s_at	protein tyrosine phosphatase, receptor type, F	PTPRF	14.7188	down
200637_s_at	protein tyrosine phosphatase, receptor type, F	PTPRF	1.98308	up
200638_s_at	tyrosine 3-monooxygenase/tryptophan 5-monooxygenase activation protein, zeta polypeptide	YWHAZ	1.25631	up
200639_s_at	tyrosine 3-monooxygenase/tryptophan 5-monooxygenase activation protein, zeta polypeptide	YWHAZ	1.97774	down
200640_at	tyrosine 3-monooxygenase/tryptophan 5-monooxygenase activation protein, zeta polypeptide	YWHAZ	1.53701	down
200641_s_at	tyrosine 3-monooxygenase/tryptophan 5-monooxygenase activation protein, zeta polypeptide	YWHAZ	1.42208	up
200642_at	superoxide dismutase 1, soluble (amyotrophic lateral sclerosis 1 (adult))	SOD1	1.73806	down
200643_at	high density lipoprotein binding protein (vigilin)	HDLBP	3.76641	down
200644_at	MARCKS-like 1	MARCKSL1	24.7988	down
200645_at	GABA(A) receptor-associated protein	GABARAP	1.24118	down
200646_s_at	nucleobindin 1	NUCB1	1.18039	up
200647_x_at	eukaryotic translation initiation factor 3, subunit 8, 110kDa /// similar to eukaryotic translation initiation factor 3, subunit 8	EIF3S8 /// LOC653352	6.12533	down
200648_s_at	glutamate-ammonia ligase (glutamine synthetase)	GLUL	1.45186	up
200649_at	nucleobindin 1	NUCB1	1.82523	down
200650_s_at	lactate dehydrogenase A	LDHA	8.52245	down
200651_at	guanine nucleotide binding protein (G protein), beta polypeptide 2-like 1	GNB2L1	5.69036	down
200652_at	signal sequence receptor, beta (translocon-associated protein beta)	SSR2	4.97642	down
200653_s_at	calmodulin 1 (phosphorylase kinase, delta)	CALM1	5.28612	down
200654_at	procollagen-proline, 2-oxoglutarate 4-dioxygenase (proline 4-hydroxylase), beta polypeptide	P4HB	6.60215	down
200655_s_at	calmodulin 1 (phosphorylase kinase, delta)	CALM1	6.52453	down
200656_s_at	procollagen-proline, 2-oxoglutarate 4-dioxygenase (proline 4-hydroxylase), beta polypeptide	P4HB	5.85766	down
200657_at	solute carrier family 25 (mitochondrial carrier; adenine nucleotide translocator), member 5	SLC25A5	4.92823	down
200658_s_at	prohibitin	PHB	8.45618	down
200659_s_at	prohibitin	PHB	3.95032	down
200660_at	S100 calcium binding protein A11 (calgizzarin)	S100A11	4.60053	down
200661_at	protective protein for beta-galactosidase (galactosialidosis)	PPGB	3.46352	up
200662_s_at	translocase of outer mitochondrial membrane 20 homolog (yeast)	TOMM20	6.9895	down
200663_at	CD63 molecule	CD63	7.37229	down
200664_s_at	DnaJ (Hsp40) homolog, subfamily B, member 1	DNAJB1	1.2178	down
200665_s_at	secreted protein, acidic, cysteine-rich (osteonectin) /// secreted protein, acidic, cysteine-rich (osteonectin)	SPARC	1.60157	down
200666_s_at	DnaJ (Hsp40) homolog, subfamily B, member 1	DNAJB1	2.24002	down
200667_at	ubiquitin-conjugating enzyme E2D 3 (UBC4/5 homolog, yeast)	UBE2D3	1.19518	down
200668_s_at	ubiquitin-conjugating enzyme E2D 3 (UBC4/5 homolog, yeast)	UBE2D3	1.05863	up
200669_s_at	ubiquitin-conjugating enzyme E2D 3 (UBC4/5 homolog, yeast)	UBE2D3	1.39873	up
200670_at	X-box binding protein 1	XBP1	4.89211	down
200671_s_at	spectrin, beta, non-erythrocytic 1	SPTBN1	3.12653	down
200672_x_at	spectrin, beta, non-erythrocytic 1	SPTBN1	1.93616	down
200673_at	lysosomal-associated protein transmembrane 4 alpha	LAPTM4A	14.5844	down
200674_s_at	ribosomal protein L32	RPL32	3.34727	down
200675_at	CD81 molecule	CD81	18.7009	down
200676_s_at	ubiquitin-conjugating enzyme E2L 3	UBE2L3	1.90438	down
200677_at	pituitary tumor-transforming 1 interacting protein	PTTG1IP	11.9981	down
200678_x_at	granulin	GRN	2.67509	down
200679_x_at	high-mobility group box 1	HMGB1	2.38913	down
200680_x_at	high-mobility group box 1	HMGB1	1.88143	down
200681_at	glyoxalase I	GLO1	18.7113	down
200682_s_at	ubiquitin-conjugating enzyme E2L 3	UBE2L3	1.91535	down
200683_s_at	ubiquitin-conjugating enzyme E2L 3	UBE2L3	2.4748	down
200684_s_at	ubiquitin-conjugating enzyme E2L 3	UBE2L3	4.8046	down
200685_at	splicing factor, arginine/serine-rich 11	SFRS11	12.7594	down
200686_s_at	splicing factor, arginine/serine-rich 11	SFRS11	4.56037	down
200687_s_at	splicing factor 3b, subunit 3, 130kDa	SF3B3	19.1839	down
200688_at	splicing factor 3b, subunit 3, 130kDa	SF3B3	1.02327	up
200689_x_at	eukaryotic translation elongation factor 1 gamma /// similar to Elongation factor 1-gamma (EF-1-gamma) (eEF-1B gamma)	EEF1G /// LOC654007	4.29661	down
200690_at	heat shock 70kDa protein 9B (mortalin-2)	HSPA9B	1.24686	down
200691_s_at	heat shock 70kDa protein 9B (mortalin-2)	HSPA9B	4.55961	down
200692_s_at	heat shock 70kDa protein 9B (mortalin-2)	HSPA9B	4.94163	down
200693_at	tyrosine 3-monooxygenase/tryptophan 5-monooxygenase activation protein, theta polypeptide	YWHAQ	3.35779	down
200694_s_at	DEAD (Asp-Glu-Ala-Asp) box polypeptide 24	DDX24	10.6125	down
200695_at	protein phosphatase 2 (formerly 2A), regulatory subunit A (PR 65), alpha isoform	PPP2R1A	3.1017	down
200696_s_at	gelsolin (amyloidosis, Finnish type)	GSN	1.41613	down
200697_at	hexokinase 1	HK1	1.22856	up
200698_at	KDEL (Lys-Asp-Glu-Leu) endoplasmic reticulum protein retention receptor 2	KDELR2	14.4236	down
200699_at	KDEL (Lys-Asp-Glu-Leu) endoplasmic reticulum protein retention receptor 2	KDELR2	14.113	down
200700_s_at	KDEL (Lys-Asp-Glu-Leu) endoplasmic reticulum protein retention receptor 2	KDELR2	5.97013	down
200701_at	Niemann-Pick disease, type C2	NPC2	4.48399	down
200702_s_at	DEAD (Asp-Glu-Ala-Asp) box polypeptide 24	DDX24	3.16418	down
200703_at	dynein, light chain, LC8-type 1	DYNLL1	1.74188	down
200704_at	lipopolysaccharide-induced TNF factor	LITAF	6.47812	down
200705_s_at	eukaryotic translation elongation factor 1 beta 2	EEF1B2	5.62633	down
200706_s_at	lipopolysaccharide-induced TNF factor	LITAF	12.6389	down
200707_at	protein kinase C substrate 80K-H	PRKCSH	2.36638	down
200708_at	glutamic-oxaloacetic transaminase 2, mitochondrial (aspartate aminotransferase 2)	GOT2	18.4724	down
200709_at	FK506 binding protein 1A, 12kDa	FKBP1A	5.64904	down
200710_at	acyl-Coenzyme A dehydrogenase, very long chain	ACADVL	2.23855	down
200711_s_at	S-phase kinase-associated protein 1A (p19A)	SKP1A	1.82713	down
200712_s_at	microtubule-associated protein, RP/EB family, member 1	MAPRE1	3.80742	down
200713_s_at	microtubule-associated protein, RP/EB family, member 1	MAPRE1	3.3807	down
200714_x_at	amplified in osteosarcoma	OS9	3.77678	down
200715_x_at	ribosomal protein L13a	RPL13A	4.53619	down
200716_x_at	ribosomal protein L13a	RPL13A	4.34201	down
200717_x_at	ribosomal protein L7	RPL7	2.2259	down
200718_s_at	S-phase kinase-associated protein 1A (p19A)	SKP1A	1.32934	up
200719_at	S-phase kinase-associated protein 1A (p19A)	SKP1A	1.11569	down
200720_s_at	ARP1 actin-related protein 1 homolog A, centractin alpha (yeast)	ACTR1A	1.5355	down
200721_s_at	ARP1 actin-related protein 1 homolog A, centractin alpha (yeast)	ACTR1A	1.04778	down
200722_s_at	GPI-anchored membrane protein 1	GPIAP1	1.73257	down
200723_s_at	GPI-anchored membrane protein 1	GPIAP1	5.54786	down
200724_at	ribosomal protein L10	RPL10	1.05631	up
200725_x_at	ribosomal protein L10	RPL10	4.25496	down
200726_at	protein phosphatase 1, catalytic subunit, gamma isoform	PPP1CC	4.36918	down
200727_s_at	ARP2 actin-related protein 2 homolog (yeast)	ACTR2	1.14778	down
200728_at	ARP2 actin-related protein 2 homolog (yeast)	ACTR2	2.07381	down
200729_s_at	ARP2 actin-related protein 2 homolog (yeast)	ACTR2	2.1417	down
200730_s_at	protein tyrosine phosphatase type IVA, member 1	PTP4A1	1.46854	down
200731_s_at	protein tyrosine phosphatase type IVA, member 1	PTP4A1	2.37482	down
200732_s_at	protein tyrosine phosphatase type IVA, member 1	PTP4A1	4.38684	down
200733_s_at	protein tyrosine phosphatase type IVA, member 1	PTP4A1	6.29226	down
200734_s_at	ADP-ribosylation factor 3	ARF3	1.30799	down
200735_x_at	nascent-polypeptide-associated complex alpha polypeptide	NACA	3.10001	down
200736_s_at	glutathione peroxidase 1	GPX1	1.9566	up
200737_at	phosphoglycerate kinase 1	PGK1	1.52894	down
200738_s_at	phosphoglycerate kinase 1	PGK1	3.39272	down
200739_s_at	SMT3 suppressor of mif two 3 homolog 3 (S. cerevisiae)	SUMO3	2.10999	down
200740_s_at	SMT3 suppressor of mif two 3 homolog 3 (S. cerevisiae)	SUMO3	3.14984	down
200741_s_at	ribosomal protein S27 (metallopanstimulin 1)	RPS27	2.60994	down
200742_s_at	tripeptidyl peptidase I	TPP1	1.40366	down
200743_s_at	tripeptidyl peptidase I	TPP1	1.29068	down
200744_s_at	guanine nucleotide binding protein (G protein), beta polypeptide 1	GNB1	1.62893	up
200745_s_at	guanine nucleotide binding protein (G protein), beta polypeptide 1	GNB1	3.03235	down
200746_s_at	guanine nucleotide binding protein (G protein), beta polypeptide 1	GNB1	3.19197	down
200747_s_at	nuclear mitotic apparatus protein 1	NUMA1	3.46705	down
200748_s_at	ferritin, heavy polypeptide 1	FTH1	1.03458	down
200749_at	RAN, member RAS oncogene family	RAN	13.4506	down
200750_s_at	RAN, member RAS oncogene family	RAN	6.9123	down
200751_s_at	heterogeneous nuclear ribonucleoprotein C (C1/C2)	HNRPC	4.0352	down
200752_s_at	calpain 1, (mu/I) large subunit	CAPN1	1.28881	up
200753_x_at	splicing factor, arginine/serine-rich 2	SFRS2	9.2919	down
200754_x_at	splicing factor, arginine/serine-rich 2	SFRS2	4.36456	down
200755_s_at	calumenin	CALU	57.3773	down
200756_x_at	calumenin	CALU	1.7622	up
200757_s_at	calumenin	CALU	15.7925	down
200758_s_at	nuclear factor (erythroid-derived 2)-like 1	NFE2L1	54.767	down
200759_x_at	nuclear factor (erythroid-derived 2)-like 1	NFE2L1	21.2238	down
200760_s_at	ADP-ribosylation-like factor 6 interacting protein 5	ARL6IP5	1.82331	down
200761_s_at	ADP-ribosylation-like factor 6 interacting protein 5	ARL6IP5	2.85663	down
200762_at	dihydropyrimidinase-like 2	DPYSL2	5.21683	down
200763_s_at	ribosomal protein, large, P1	RPLP1	2.64825	down
200764_s_at	catenin (cadherin-associated protein), alpha 1, 102kDa	CTNNA1	11.7388	down
200765_x_at	catenin (cadherin-associated protein), alpha 1, 102kDa	CTNNA1	9.37987	down
200766_at	cathepsin D (lysosomal aspartyl peptidase)	CTSD	1.70891	down
200767_s_at	chromosome 9 open reading frame 10	C9orf10	1.47514	up
200768_s_at	methionine adenosyltransferase II, alpha	MAT2A	9.12025	down
200769_s_at	methionine adenosyltransferase II, alpha	MAT2A	1.48095	up
200770_s_at	laminin, gamma 1 (formerly LAMB2)	LAMC1	1.70496	down
200771_at	laminin, gamma 1 (formerly LAMB2)	LAMC1	41.3724	down
200772_x_at	prothymosin, alpha (gene sequence 28)	PTMA	3.87889	down
200773_x_at	prothymosin, alpha (gene sequence 28) /// hypothetical gene supported by BC013859 /// similar to prothymosin, alpha (gene sequence 28)	PTMA /// LOC441454 /// LOC643287	3.9286	down
200774_at	chromosome 9 open reading frame 10	C9orf10	2.94581	down
200775_s_at	heterogeneous nuclear ribonucleoprotein K	HNRPK	2.89468	down
200776_s_at	basic leucine zipper and W2 domains 1 /// similar to basic leucine zipper and W2 domains 1	BZW1 /// LOC151579	4.4952	down
200777_s_at	basic leucine zipper and W2 domains 1 /// similar to basic leucine zipper and W2 domains 1	BZW1 /// LOC151579	12.9683	down
200778_s_at	septin 2	2008-09-02	4.05438	down
200779_at	activating transcription factor 4 (tax-responsive enhancer element B67)	ATF4	1.78116	down
200780_x_at	GNAS complex locus	GNAS	1.21793	up
200781_s_at	ribosomal protein S15a	RPS15A	2.40838	down
200782_at	annexin A5	ANXA5	5.4481	down
200783_s_at	stathmin 1/oncoprotein 18	STMN1	22.0393	down
200784_s_at	low density lipoprotein-related protein 1 (alpha-2-macroglobulin receptor)	LRP1	1.76951	down
200785_s_at	low density lipoprotein-related protein 1 (alpha-2-macroglobulin receptor)	LRP1	1.09723	up
200786_at	proteasome (prosome, macropain) subunit, beta type, 7	PSMB7	5.13317	down
200787_s_at	phosphoprotein enriched in astrocytes 15	PEA15	6.82895	down
200788_s_at	phosphoprotein enriched in astrocytes 15	PEA15	13.6402	down
200789_at	enoyl Coenzyme A hydratase 1, peroxisomal	ECH1	2.7386	down
200790_at	ornithine decarboxylase 1	ODC1	2.23063	up
200791_s_at	IQ motif containing GTPase activating protein 1	IQGAP1	4.98656	down
200792_at	X-ray repair complementing defective repair in Chinese hamster cells 6 (Ku autoantigen, 70kDa)	XRCC6	5.3791	down
200793_s_at	aconitase 2, mitochondrial	ACO2	1.71739	down
200794_x_at	DAZ associated protein 2	DAZAP2	1.35503	down
200795_at	SPARC-like 1 (mast9, hevin)	SPARCL1	44.536	down
200796_s_at	myeloid cell leukemia sequence 1 (BCL2-related)	MCL1	1.07575	up
200797_s_at	myeloid cell leukemia sequence 1 (BCL2-related)	MCL1	6.49028	down
200798_x_at	myeloid cell leukemia sequence 1 (BCL2-related)	MCL1	6.5413	down
200799_at	heat shock 70kDa protein 1A	HSPA1A	1.17333	down
200800_s_at	heat shock 70kDa protein 1A /// heat shock 70kDa protein 1B	HSPA1A /// HSPA1B	1.42112	down
200801_x_at	actin, beta	ACTB	1.20192	down
200802_at	seryl-tRNA synthetase	SARS	5.2011	down
200803_s_at	testis enhanced gene transcript (BAX inhibitor 1)	TEGT	2.13934	down
200804_at	testis enhanced gene transcript (BAX inhibitor 1)	TEGT	5.26416	down
200805_at	lectin, mannose-binding 2	LMAN2	4.9007	down
200806_s_at	heat shock 60kDa protein 1 (chaperonin)	HSPD1	2.37331	down
200807_s_at	heat shock 60kDa protein 1 (chaperonin)	HSPD1	12.5914	down
200808_s_at	zyxin	ZYX	1.53771	up
200809_x_at	ribosomal protein L12	RPL12	2.83311	down
200810_s_at	cold inducible RNA binding protein	CIRBP	4.52577	down
200811_at	cold inducible RNA binding protein	CIRBP	4.11767	down
200812_at	chaperonin containing TCP1, subunit 7 (eta)	CCT7	7.29456	down
200813_s_at	platelet-activating factor acetylhydrolase, isoform Ib, alpha subunit 45kDa	PAFAH1B1	1.23239	up
200814_at	proteasome (prosome, macropain) activator subunit 1 (PA28 alpha)	PSME1	2.81233	down
200815_s_at	platelet-activating factor acetylhydrolase, isoform Ib, alpha subunit 45kDa	PAFAH1B1	3.15988	down
200816_s_at	platelet-activating factor acetylhydrolase, isoform Ib, alpha subunit 45kDa	PAFAH1B1	8.4091	down
200817_x_at	ribosomal protein S10	RPS10	2.99003	down
200818_at	ATP synthase, H+ transporting, mitochondrial F1 complex, O subunit (oligomycin sensitivity conferring protein)	ATP5O	7.31452	down
200819_s_at	ribosomal protein S15	RPS15	2.27874	down
200820_at	proteasome (prosome, macropain) 26S subunit, non-ATPase, 8	PSMD8	2.45531	down
200821_at	lysosomal-associated membrane protein 2	LAMP2	5.63687	down
200822_x_at	triosephosphate isomerase 1	TPI1	3.33237	down
200823_x_at	ribosomal protein L29	RPL29	5.95662	down
200824_at	glutathione S-transferase pi	GSTP1	5.46281	down
200825_s_at	hypoxia up-regulated 1	HYOU1	5.57396	down
200826_at	small nuclear ribonucleoprotein D2 polypeptide 16.5kDa	SNRPD2	5.16785	down
200827_at	procollagen-lysine 1, 2-oxoglutarate 5-dioxygenase 1	PLOD1	5.72081	down
200828_s_at	zinc finger protein 207	ZNF207	2.7066	down
200829_x_at	zinc finger protein 207	ZNF207	4.49293	down
200830_at	proteasome (prosome, macropain) 26S subunit, non-ATPase, 2	PSMD2	1.51537	down
200831_s_at	stearoyl-CoA desaturase (delta-9-desaturase)	SCD	1.88145	down
200832_s_at	stearoyl-CoA desaturase (delta-9-desaturase)	SCD	9.61964	down
200833_s_at	RAP1B, member of RAS oncogene family /// similar to RAS related protein 1b isoform 1	RAP1B /// LOC643752	1.2233	down
200834_s_at	ribosomal protein S21	RPS21	6.17429	down
200835_s_at	microtubule-associated protein 4	MAP4	1.27808	up
200836_s_at	microtubule-associated protein 4	MAP4	1.16115	down
200837_at	B-cell receptor-associated protein 31	BCAP31	2.90768	down
200838_at	cathepsin B	CTSB	1.31057	up
200839_s_at	cathepsin B	CTSB	1.10666	up
200840_at	lysyl-tRNA synthetase	KARS	3.0897	down
200841_s_at	glutamyl-prolyl-tRNA synthetase	EPRS	2.14856	up
200842_s_at	glutamyl-prolyl-tRNA synthetase	EPRS	6.29779	down
200843_s_at	glutamyl-prolyl-tRNA synthetase	EPRS	8.59407	down
200844_s_at	peroxiredoxin 6	PRDX6	2.3775	up
200845_s_at	peroxiredoxin 6	PRDX6	1.15231	down
200846_s_at	protein phosphatase 1, catalytic subunit, alpha isoform	PPP1CA	2.17279	down
200847_s_at	transmembrane protein 66	TMEM66	2.04883	down
200848_at	S-adenosylhomocysteine hydrolase-like 1	AHCYL1	4.85767	down
200849_s_at	S-adenosylhomocysteine hydrolase-like 1	AHCYL1	5.66695	down
200850_s_at	S-adenosylhomocysteine hydrolase-like 1	AHCYL1	3.82843	down
200851_s_at	KIAA0174	KIAA0174	4.317	down
200852_x_at	guanine nucleotide binding protein (G protein), beta polypeptide 2	GNB2	2.2915	down
200853_at	H2A histone family, member Z	H2AFZ	6.28278	down
200854_at	nuclear receptor co-repressor 1	NCOR1	2.37523	down
200855_at	nuclear receptor co-repressor 1 /// chromosome 20 open reading frame 191	NCOR1 /// C20orf191	1.16997	up
200856_x_at	nuclear receptor co-repressor 1 /// chromosome 20 open reading frame 191	NCOR1 /// C20orf191	1.377	down
200857_s_at	nuclear receptor co-repressor 1	NCOR1	1.10615	up
200858_s_at	ribosomal protein S8	RPS8	4.05369	down
200859_x_at	filamin A, alpha (actin binding protein 280)	FLNA	1.06729	down
200860_s_at	CCR4-NOT transcription complex, subunit 1	CNOT1	2.70122	down
200861_at	CCR4-NOT transcription complex, subunit 1	CNOT1	1.50387	up
200862_at	24-dehydrocholesterol reductase	DHCR24	1.06511	down
200863_s_at	RAB11A, member RAS oncogene family	RAB11A	2.94474	down
200864_s_at	RAB11A, member RAS oncogene family	RAB11A	2.2409	down
200865_at			1.1358	up
200866_s_at	prosaposin (variant Gaucher disease and variant metachromatic leukodystrophy)	PSAP	1.57162	down
200867_at	zinc finger protein 313	ZNF313	2.34876	down
200868_s_at	zinc finger protein 313	ZNF313	1.14522	down
200869_at	ribosomal protein L18a /// similar to ribosomal protein L18a; 60S ribosomal protein L18a	RPL18A /// LOC390354	2.85655	down
200870_at	serine/threonine kinase receptor associated protein	STRAP	1.84217	down
200871_s_at	prosaposin (variant Gaucher disease and variant metachromatic leukodystrophy)	PSAP	1.61314	down
200872_at	S100 calcium binding protein A10 (annexin II ligand, calpactin I, light polypeptide (p11))	S100A10	10.6553	down
200873_s_at	chaperonin containing TCP1, subunit 8 (theta)	CCT8	5.08241	down
200874_s_at	nucleolar protein 5A (56kDa with KKE/D repeat)	NOL5A	1.21532	up
200875_s_at	nucleolar protein 5A (56kDa with KKE/D repeat)	NOL5A	1.20605	down
200876_s_at	proteasome (prosome, macropain) subunit, beta type, 1	PSMB1	7.32153	down
200877_at	chaperonin containing TCP1, subunit 4 (delta)	CCT4	8.96832	down
200878_at	endothelial PAS domain protein 1	EPAS1	93.3136	down
200879_s_at	endothelial PAS domain protein 1	EPAS1	1.31251	up
200880_at	DnaJ (Hsp40) homolog, subfamily A, member 1	DNAJA1	2.91631	down
200881_s_at	DnaJ (Hsp40) homolog, subfamily A, member 1	DNAJA1	2.66216	down
200882_s_at	proteasome (prosome, macropain) 26S subunit, non-ATPase, 4	PSMD4	1.07126	up
200883_at	ubiquinol-cytochrome c reductase core protein II	UQCRC2	4.22866	down
200884_at	creatine kinase, brain	CKB	4.4172	down
200885_at	ras homolog gene family, member C	RHOC	7.82872	down
200886_s_at	phosphoglycerate mutase 1 (brain) /// similar to Phosphoglycerate mutase 1 (Phosphoglycerate mutase isozyme B) (PGAM-B) (BPG-dependent PGAM 1) /// similar to Phosphoglycerate mutase 1 (Phosphoglycerate mutase isozyme B) (PGAM-B) (BPG-dependent PGAM 1)	PGAM1 /// LOC642969 /// LOC643576	3.04922	down
200887_s_at	signal transducer and activator of transcription 1, 91kDa	STAT1	4.2237	down
200888_s_at	ribosomal protein L23	RPL23	4.32536	down
200889_s_at	signal sequence receptor, alpha (translocon-associated protein alpha)	SSR1	1.81133	down
200890_s_at	signal sequence receptor, alpha (translocon-associated protein alpha)	SSR1	5.7233	down
200891_s_at	signal sequence receptor, alpha (translocon-associated protein alpha)	SSR1	4.01383	down
200892_s_at	splicing factor, arginine/serine-rich 10 (transformer 2 homolog, Drosophila)	SFRS10	6.44148	down
200893_at	splicing factor, arginine/serine-rich 10 (transformer 2 homolog, Drosophila)	SFRS10	8.62306	down
200894_s_at	FK506 binding protein 4, 59kDa	FKBP4	1.34479	up
200895_s_at	FK506 binding protein 4, 59kDa	FKBP4	1.144	down
200896_x_at	hepatoma-derived growth factor (high-mobility group protein 1-like)	HDGF	1.52056	up
200897_s_at	palladin, cytoskeletal associated protein	PALLD	8.88997	down
200898_s_at	meningioma expressed antigen 5 (hyaluronidase)	MGEA5	2.53461	down
200899_s_at	meningioma expressed antigen 5 (hyaluronidase)	MGEA5	2.43168	down
200900_s_at	mannose-6-phosphate receptor (cation dependent)	M6PR	1.29856	down
200901_s_at	mannose-6-phosphate receptor (cation dependent)	M6PR	2.91229	down
200902_at	15 kDa selenoprotein	2008-09-15	6.6352	down
200903_s_at	S-adenosylhomocysteine hydrolase	AHCY	18.4656	down
200904_at	major histocompatibility complex, class I, E	HLA-E	1.80786	down
200905_x_at	major histocompatibility complex, class I, E	HLA-E	1.22498	down
200906_s_at	palladin, cytoskeletal associated protein	PALLD	3.2694	down
200907_s_at	palladin, cytoskeletal associated protein	PALLD	1.49053	up
200908_s_at	ribosomal protein, large, P2	RPLP2	1.38568	down
200909_s_at	ribosomal protein, large, P2	RPLP2	3.20222	down
200910_at	chaperonin containing TCP1, subunit 3 (gamma)	CCT3	6.77145	down
200911_s_at	transforming, acidic coiled-coil containing protein 1	TACC1	9.87225	down
200912_s_at	eukaryotic translation initiation factor 4A, isoform 2	EIF4A2	6.47178	down
200913_at	protein phosphatase 1G (formerly 2C), magnesium-dependent, gamma isoform	PPM1G	6.05989	down
200914_x_at	kinectin 1 (kinesin receptor)	KTN1	4.7295	down
200915_x_at	kinectin 1 (kinesin receptor) /// protein disulfide isomerase family A, member 6	KTN1 /// PDIA6	9.24661	down
200916_at	transgelin 2	TAGLN2	1.19735	up
200917_s_at	signal recognition particle receptor ('docking protein')	SRPR	1.11822	down
200918_s_at	signal recognition particle receptor ('docking protein')	SRPR	4.72297	down
200919_at	polyhomeotic-like 2 (Drosophila)	PHC2	3.97484	down
200920_s_at	B-cell translocation gene 1, anti-proliferative	BTG1	3.25972	down
200921_s_at	B-cell translocation gene 1, anti-proliferative	BTG1	4.10574	down
200922_at	KDEL (Lys-Asp-Glu-Leu) endoplasmic reticulum protein retention receptor 1	KDELR1	3.02156	down
200923_at	lectin, galactoside-binding, soluble, 3 binding protein	LGALS3BP	1.42548	down
200924_s_at	solute carrier family 3 (activators of dibasic and neutral amino acid transport), member 2	SLC3A2	1.42568	down
200925_at	cytochrome c oxidase subunit VIa polypeptide 1	COX6A1	2.85682	down
200926_at	ribosomal protein S23	RPS23	3.77828	down
200927_s_at	RAB14, member RAS oncogene family	RAB14	6.20737	down
200928_s_at	RAB14, member RAS oncogene family	RAB14	4.35761	down
200929_at	transmembrane emp24-like trafficking protein 10 (yeast)	TMED10	3.54302	down
200930_s_at	vinculin	VCL	5.01712	up
200931_s_at	vinculin	VCL	2.10339	up
200932_s_at	dynactin 2 (p50)	DCTN2	4.69674	down
200933_x_at	ribosomal protein S4, X-linked	RPS4X	2.83208	down
200934_at	DEK oncogene (DNA binding)	DEK	3.49459	down
200935_at	calreticulin	CALR	1.27047	up
200936_at	ribosomal protein L8	RPL8	3.854	down
200937_s_at	ribosomal protein L5	RPL5	4.75539	down
200938_s_at	arginine-glutamic acid dipeptide (RE) repeats	RERE	1.18774	down
200939_s_at	arginine-glutamic acid dipeptide (RE) repeats	RERE	2.18257	up
200940_s_at	arginine-glutamic acid dipeptide (RE) repeats	RERE	7.64702	down
200941_at	heat shock factor binding protein 1	HSBP1	2.90674	down
200942_s_at	heat shock factor binding protein 1	HSBP1	3.80904	down
200943_at	high-mobility group nucleosome binding domain 1	HMGN1	5.23133	down
200944_s_at	high-mobility group nucleosome binding domain 1	HMGN1	4.23449	down
200945_s_at	SEC31-like 1 (S. cerevisiae)	SEC31L1	6.81018	down
200946_x_at	glutamate dehydrogenase 1	GLUD1	6.91609	down
200947_s_at	glutamate dehydrogenase 1	GLUD1	19.5156	down
200948_at	myeloid leukemia factor 2	MLF2	2.46165	down
200949_x_at	ribosomal protein S20	RPS20	3.70404	down
200950_at	actin related protein 2/3 complex, subunit 1A, 41kDa	ARPC1A	6.87541	down
200951_s_at	cyclin D2	CCND2	1.35833	up
200952_s_at	cyclin D2	CCND2	1.13396	up
200953_s_at	cyclin D2	CCND2	10.8349	down
200954_at	ATPase, H+ transporting, lysosomal 16kDa, V0 subunit c	ATP6V0C	1.82727	up
200955_at	inner membrane protein, mitochondrial (mitofilin)	IMMT	3.6522	down
200956_s_at	structure specific recognition protein 1	SSRP1	1.00457	up
200957_s_at	structure specific recognition protein 1	SSRP1	7.0417	down
200958_s_at	syndecan binding protein (syntenin)	SDCBP	3.45315	down
200959_at	fusion (involved in t(12;16) in malignant liposarcoma)	FUS	3.41362	down
200960_x_at	clathrin, light polypeptide (Lca)	CLTA	9.41646	down
200961_at	selenophosphate synthetase 2	SEPHS2	5.11034	down
200962_at	ribosomal protein L31 /// similar to ribosomal protein L31	RPL31 /// LOC653773	3.96069	down
200963_x_at	ribosomal protein L31	RPL31	4.02785	down
200964_at	ubiquitin-activating enzyme E1 (A1S9T and BN75 temperature sensitivity complementing)	UBE1	2.28812	down
200965_s_at	actin binding LIM protein 1	ABLIM1	17.6724	down
200966_x_at	aldolase A, fructose-bisphosphate	ALDOA	2.38523	down
200967_at	peptidylprolyl isomerase B (cyclophilin B)	PPIB	6.70978	down
200968_s_at	peptidylprolyl isomerase B (cyclophilin B)	PPIB	7.99388	down
200969_at	stress-associated endoplasmic reticulum protein 1	SERP1	2.24405	down
200970_s_at	stress-associated endoplasmic reticulum protein 1	SERP1	3.18128	down
200971_s_at	stress-associated endoplasmic reticulum protein 1	SERP1	3.30716	down
200972_at	tetraspanin 3	TSPAN3	34.4124	down
200973_s_at	tetraspanin 3	TSPAN3	38.9769	down
200974_at	actin, alpha 2, smooth muscle, aorta	ACTA2	59.2762	down
200975_at	palmitoyl-protein thioesterase 1 (ceroid-lipofuscinosis, neuronal 1, infantile)	PPT1	2.7033	down
200976_s_at	Tax1 (human T-cell leukemia virus type I) binding protein 1	TAX1BP1	1.40941	down
200977_s_at	Tax1 (human T-cell leukemia virus type I) binding protein 1	TAX1BP1	2.38366	down
200978_at	malate dehydrogenase 1, NAD (soluble)	MDH1	4.36918	down
200979_at	Mitogen-activated protein kinase kinase kinase 15	MAP3K15	1.68636	down
200980_s_at	pyruvate dehydrogenase (lipoamide) alpha 1	PDHA1	3.36665	down
200981_x_at	GNAS complex locus	GNAS	1.23252	up
200982_s_at	annexin A6	ANXA6	2.40887	down
200983_x_at	CD59 molecule, complement regulatory protein	CD59	5.39828	down
200984_s_at	CD59 molecule, complement regulatory protein	CD59	7.41777	down
200985_s_at	CD59 molecule, complement regulatory protein	CD59	12.6092	down
200986_at	serpin peptidase inhibitor, clade G (C1 inhibitor), member 1, (angioedema, hereditary)	SERPING1	14.1571	down
200987_x_at	proteasome (prosome, macropain) activator subunit 3 (PA28 gamma; Ki)	PSME3	3.603	down
200988_s_at	proteasome (prosome, macropain) activator subunit 3 (PA28 gamma; Ki)	PSME3	1.14759	down
200989_at	hypoxia-inducible factor 1, alpha subunit (basic helix-loop-helix transcription factor)	HIF1A	6.71575	down
200990_at	tripartite motif-containing 28	TRIM28	7.81326	down
200991_s_at	sorting nexin 17	SNX17	2.7683	down
200992_at	importin 7	IPO7	16.8121	down
200993_at	importin 7	IPO7	24.7327	down
200994_at	Importin 7	IPO7	16.8	down
200995_at	Importin 7	IPO7	6.29184	down
200996_at	ARP3 actin-related protein 3 homolog (yeast)	ACTR3	1.88826	down
200997_at	RNA binding motif protein 4 /// similar to RNA-binding protein 4 (RNA-binding motif protein 4) (Lark homolog) (Hlark) (RNA-binding motif protein 4a)	RBM4 /// LOC650029	5.34877	down
200998_s_at	cytoskeleton-associated protein 4	CKAP4	3.97841	down
200999_s_at	cytoskeleton-associated protein 4	CKAP4	6.78125	down
201000_at	alanyl-tRNA synthetase	AARS	10.824	down
201001_s_at	ubiquitin-conjugating enzyme E2 variant 1 /// ubiquitin-conjugating enzyme E2 variant 1	UBE2V1 /// Kua-UEV	1.0661	down
201002_s_at	ubiquitin-conjugating enzyme E2 variant 1 /// ubiquitin-conjugating enzyme E2 variant 1	UBE2V1 /// Kua-UEV	1.16838	down
201003_x_at	arginyl aminopeptidase (aminopeptidase B) /// ubiquitin-conjugating enzyme E2 variant 1 /// ubiquitin-conjugating enzyme variant Kua /// ubiquitin-conjugating enzyme E2 variant 1	RNPEP /// UBE2V1 /// Kua /// Kua-UEV	2.44421	down
201004_at	signal sequence receptor, delta (translocon-associated protein delta)	SSR4	2.53966	down
201005_at	CD9 molecule	CD9	7.85201	down
201006_at	peroxiredoxin 2	PRDX2	1.35815	down
201007_at	hydroxyacyl-Coenzyme A dehydrogenase/3-ketoacyl-Coenzyme A thiolase/enoyl-Coenzyme A hydratase (trifunctional protein), beta subunit	HADHB	4.33347	down
201008_s_at	thioredoxin interacting protein	TXNIP	3.7162	down
201009_s_at	thioredoxin interacting protein	TXNIP	3.9472	down
201010_s_at	thioredoxin interacting protein	TXNIP	3.88569	down
201011_at	ribophorin I	RPN1	9.38634	down
201012_at	annexin A1	ANXA1	4.42366	down
201013_s_at	phosphoribosylaminoimidazole carboxylase, phosphoribosylaminoimidazole succinocarboxamide synthetase	PAICS	20.627	down
201014_s_at	phosphoribosylaminoimidazole carboxylase, phosphoribosylaminoimidazole succinocarboxamide synthetase	PAICS	2.78792	down
201015_s_at	junction plakoglobin	JUP	7.12434	down
201016_at	eukaryotic translation initiation factor 1A, X-linked	EIF1AX	4.18137	down
201017_at	eukaryotic translation initiation factor 1A, X-linked	EIF1AX	4.24851	down
201018_at	eukaryotic translation initiation factor 1A, X-linked	EIF1AX	4.50006	down
201019_s_at	eukaryotic translation initiation factor 1A, X-linked	EIF1AX	2.70331	down
201020_at	tyrosine 3-monooxygenase/tryptophan 5-monooxygenase activation protein, eta polypeptide	YWHAH	1.0834	up
201021_s_at	destrin (actin depolymerizing factor)	DSTN	18.947	down
201022_s_at	destrin (actin depolymerizing factor)	DSTN	32.128	down
201023_at	TAF7 RNA polymerase II, TATA box binding protein (TBP)-associated factor, 55kDa	TAF7	5.42946	down
201024_x_at	eukaryotic translation initiation factor 5B	EIF5B	6.45085	down
201025_at	eukaryotic translation initiation factor 5B	EIF5B	6.22982	down
201026_at	eukaryotic translation initiation factor 5B	EIF5B	5.0914	down
201027_s_at	eukaryotic translation initiation factor 5B	EIF5B	4.37116	down
201028_s_at	CD99 molecule	CD99	2.88476	down
201029_s_at	CD99 molecule	CD99	2.91019	down
201030_x_at	lactate dehydrogenase B	LDHB	5.7855	down
201031_s_at	heterogeneous nuclear ribonucleoprotein H1 (H)	HNRPH1	3.04149	down
201032_at	bladder cancer associated protein	BLCAP	9.37609	down
201033_x_at	ribosomal protein, large, P0	RPLP0	5.77944	down
201034_at	adducin 3 (gamma)	ADD3	1.09734	down
201035_s_at	L-3-hydroxyacyl-Coenzyme A dehydrogenase, short chain	HADHSC	1.29845	down
201036_s_at	L-3-hydroxyacyl-Coenzyme A dehydrogenase, short chain	HADHSC	5.24946	down
201037_at	phosphofructokinase, platelet	PFKP	6.60075	down
201038_s_at	Acidic (leucine-rich) nuclear phosphoprotein 32 family, member A	ANP32A	5.29802	down
201039_s_at	RAD23 homolog A (S. cerevisiae)	RAD23A	1.65914	up
201040_at	guanine nucleotide binding protein (G protein), alpha inhibiting activity polypeptide 2	GNAI2	2.57875	down
201041_s_at	dual specificity phosphatase 1	DUSP1	6.36375	down
201042_at	transglutaminase 2 (C polypeptide, protein-glutamine-gamma-glutamyltransferase)	TGM2	13.2533	down
201043_s_at	acidic (leucine-rich) nuclear phosphoprotein 32 family, member A	ANP32A	1.22467	up
201044_x_at	dual specificity phosphatase 1	DUSP1	1.16989	down
201045_s_at	RAB6A, member RAS oncogene family	RAB6A	1.3431	up
201046_s_at	RAD23 homolog A (S. cerevisiae)	RAD23A	1.06108	down
201047_x_at	RAB6A, member RAS oncogene family	RAB6A	1.43978	down
201048_x_at	RAB6A, member RAS oncogene family	RAB6A	2.11622	up
201049_s_at	ribosomal protein S18	RPS18	5.71534	down
201050_at	phospholipase D family, member 3	PLD3	3.96154	down
201051_at	Acidic (leucine-rich) nuclear phosphoprotein 32 family, member A	ANP32A	7.14349	down
201052_s_at	proteasome (prosome, macropain) inhibitor subunit 1 (PI31)	PSMF1	3.1694	up
201053_s_at	proteasome (prosome, macropain) inhibitor subunit 1 (PI31)	PSMF1	1.73693	up
201054_at	heterogeneous nuclear ribonucleoprotein A0	HNRPA0	10.683	down
201055_s_at	heterogeneous nuclear ribonucleoprotein A0	HNRPA0	1.27457	up
201056_at	Golgi autoantigen, golgin subfamily b, macrogolgin (with transmembrane signal), 1	GOLGB1	4.82819	down
201057_s_at	golgi autoantigen, golgin subfamily b, macrogolgin (with transmembrane signal), 1	GOLGB1	9.74419	down
201058_s_at	myosin, light polypeptide 9, regulatory	MYL9	1.85951	up
201059_at	cortactin	CTTN	1.20198	down
201060_x_at	stomatin	STOM	2.57226	down
201061_s_at	stomatin	STOM	1.43851	down
201062_at	stomatin	STOM	1.25697	up
201063_at	reticulocalbin 1, EF-hand calcium binding domain	RCN1	8.30006	down
201064_s_at	poly(A) binding protein, cytoplasmic 4 (inducible form)	PABPC4	6.09496	down
201065_s_at	general transcription factor II, i /// general transcription factor II, i, pseudogene 1 /// similar to general transcription factor II, i isoform 1	GTF2I /// GTF2IP1 /// LOC649791	1.46722	down
201066_at	cytochrome c-1	CYC1	3.67656	down
201067_at	proteasome (prosome, macropain) 26S subunit, ATPase, 2	PSMC2	2.79918	down
201068_s_at	proteasome (prosome, macropain) 26S subunit, ATPase, 2	PSMC2	7.87233	down
201069_at	matrix metallopeptidase 2 (gelatinase A, 72kDa gelatinase, 72kDa type IV collagenase)	MMP2	306.472	down
201070_x_at	splicing factor 3b, subunit 1, 155kDa	SF3B1	1.15778	up
201071_x_at	splicing factor 3b, subunit 1, 155kDa	SF3B1	4.86908	down
201072_s_at	SWI/SNF related, matrix associated, actin dependent regulator of chromatin, subfamily c, member 1	SMARCC1	1.48006	up
201073_s_at	SWI/SNF related, matrix associated, actin dependent regulator of chromatin, subfamily c, member 1	SMARCC1	1.26859	down
201074_at	SWI/SNF related, matrix associated, actin dependent regulator of chromatin, subfamily c, member 1	SMARCC1	3.60073	down
201075_s_at	SWI/SNF related, matrix associated, actin dependent regulator of chromatin, subfamily c, member 1	SMARCC1	1.36749	down
201076_at	NHP2 non-histone chromosome protein 2-like 1 (S. cerevisiae)	NHP2L1	3.49714	down
201077_s_at	NHP2 non-histone chromosome protein 2-like 1 (S. cerevisiae)	NHP2L1	7.6155	down
201078_at	transmembrane 9 superfamily member 2	TM9SF2	7.04284	down
201079_at	synaptogyrin 2	SYNGR2	7.18122	down
201080_at	Phosphatidylinositol-4-phosphate 5-kinase, type II, beta	PIP5K2B	12.1872	down
201081_s_at	phosphatidylinositol-4-phosphate 5-kinase, type II, beta	PIP5K2B	1.10376	up
201082_s_at	dynactin 1 (p150, glued homolog, Drosophila)	DCTN1	1.29614	down
201083_s_at	BCL2-associated transcription factor 1	BCLAF1	1.74989	up
201084_s_at	BCL2-associated transcription factor 1	BCLAF1	10.2536	down
201085_s_at	SON DNA binding protein	SON	1.79052	down
201086_x_at	SON DNA binding protein	SON	7.83561	down
201087_at	paxillin	PXN	4.90497	down
201088_at	karyopherin alpha 2 (RAG cohort 1, importin alpha 1) /// similar to Importin alpha-2 subunit (Karyopherin alpha-2 subunit) (SRP1-alpha) (RAG cohort protein 1)	KPNA2 /// LOC643995	10.8585	down
201089_at	ATPase, H+ transporting, lysosomal 56/58kDa, V1 subunit B2	ATP6V1B2	1.97432	down
201090_x_at	alpha tubulin	K-ALPHA-1	3.22239	down
201091_s_at	chromobox homolog 3 (HP1 gamma homolog, Drosophila) /// similar to chromobox homolog 3	CBX3 /// LOC653972	5.25581	down
201092_at	retinoblastoma binding protein 7	RBBP7	4.41958	down
201093_x_at	succinate dehydrogenase complex, subunit A, flavoprotein (Fp)	SDHA	3.78933	down
201094_at	ribosomal protein S29	RPS29	2.34521	down
201095_at	death-associated protein	DAP	2.87497	down
201096_s_at	ADP-ribosylation factor 4	ARF4	1.3716	down
201097_s_at	ADP-ribosylation factor 4	ARF4	5.18967	down
201098_at	coatomer protein complex, subunit beta 2 (beta prime)	COPB2	2.28109	down
201099_at	ubiquitin specific peptidase 9, X-linked	USP9X	3.09183	down
201100_s_at	ubiquitin specific peptidase 9, X-linked	USP9X	3.20893	down
201101_s_at	BCL2-associated transcription factor 1	BCLAF1	2.81805	down
201102_s_at	phosphofructokinase, liver	PFKL	1.48763	down
201103_x_at	neuroblastoma breakpoint family, member 11 /// neuroblastoma breakpoint family, member 15 /// neuroblastoma breakpoint family, member 9 /// neuroblastoma breakpoint family, member 10 /// neuroblastoma breakpoint family, member 16	NBPF11 /// NBPF15 /// NBPF9 /// NBPF10 /// NBPF16	2.39946	down
201104_x_at	neuroblastoma breakpoint family, member 14 /// KIAA1245 /// neuroblastoma breakpoint family, member 11 /// neuroblastoma breakpoint family, member 15 /// neuroblastoma breakpoint family, member 9 /// neuroblastoma breakpoint family, member 16	NBPF14 /// KIAA1245 /// NBPF11 /// NBPF15 /// NBPF9 /// NBPF16	1.89315	down
201105_at	lectin, galactoside-binding, soluble, 1 (galectin 1)	LGALS1	4.19509	down
201106_at	glutathione peroxidase 4 (phospholipid hydroperoxidase)	GPX4	1.11548	down
201107_s_at	thrombospondin 1	THBS1	2.27086	up
201108_s_at	thrombospondin 1	THBS1	1.92016	up
201109_s_at	thrombospondin 1	THBS1	1.26787	down
201110_s_at	thrombospondin 1	THBS1	11.6326	down
201111_at	CSE1 chromosome segregation 1-like (yeast)	CSE1L	23.0569	down
201112_s_at	CSE1 chromosome segregation 1-like (yeast)	CSE1L	3.69339	down
201113_at	Tu translation elongation factor, mitochondrial	TUFM	13.7768	down
201114_x_at	proteasome (prosome, macropain) subunit, alpha type, 7	PSMA7	5.42338	down
201115_at	polymerase (DNA directed), delta 2, regulatory subunit 50kDa	POLD2	24.7136	down
201116_s_at	carboxypeptidase E	CPE	532.182	down
201117_s_at	carboxypeptidase E	CPE	1784.53	down
201118_at	phosphogluconate dehydrogenase /// phosphogluconate dehydrogenase	PGD	1.16935	up
201119_s_at	cytochrome c oxidase subunit 8A (ubiquitous)	COX8A	3.27898	down
201120_s_at	progesterone receptor membrane component 1	PGRMC1	2.59057	up
201121_s_at	progesterone receptor membrane component 1	PGRMC1	1.6226	up
201122_x_at	eukaryotic translation initiation factor 5A	EIF5A	1.273	down
201123_s_at	eukaryotic translation initiation factor 5A	EIF5A	1.13949	down
201124_at	integrin, beta 5	ITGB5	2.55955	down
201125_s_at	integrin, beta 5	ITGB5	1.4933	up
201126_s_at	mannosyl (alpha-1,3-)-glycoprotein beta-1,2-N-acetylglucosaminyltransferase	MGAT1	1.89769	down
201127_s_at	ATP citrate lyase	ACLY	1.01872	up
201128_s_at	ATP citrate lyase	ACLY	6.48049	down
201129_at	splicing factor, arginine/serine-rich 7, 35kDa	SFRS7	11.3936	down
201130_s_at	cadherin 1, type 1, E-cadherin (epithelial)	CDH1	1.08251	down
201131_s_at	cadherin 1, type 1, E-cadherin (epithelial)	CDH1	1.35738	up
201132_at	heterogeneous nuclear ribonucleoprotein H2 (H')	HNRPH2	8.51334	down
201133_s_at	praja 2, RING-H2 motif containing	PJA2	4.19532	down
201134_x_at	cytochrome c oxidase subunit VIIc	COX7C	3.22697	down
201135_at	enoyl Coenzyme A hydratase, short chain, 1, mitochondrial	ECHS1	33.3495	down
201136_at	proteolipid protein 2 (colonic epithelium-enriched)	PLP2	1.04704	down
201137_s_at	major histocompatibility complex, class II, DP beta 1	HLA-DPB1	1.08832	up
201138_s_at	Sjogren syndrome antigen B (autoantigen La)	SSB	6.30356	down
201139_s_at	Sjogren syndrome antigen B (autoantigen La)	SSB	7.22536	down
201140_s_at	RAB5C, member RAS oncogene family	RAB5C	1.07688	up
201141_at	glycoprotein (transmembrane) nmb	GPNMB	5.52362	down
201142_at	eukaryotic translation initiation factor 2, subunit 1 alpha, 35kDa	EIF2S1	1.39045	down
201143_s_at	eukaryotic translation initiation factor 2, subunit 1 alpha, 35kDa	EIF2S1	3.82692	down
201144_s_at	eukaryotic translation initiation factor 2, subunit 1 alpha, 35kDa	EIF2S1	4.2937	down
201145_at	HCLS1 associated protein X-1	HAX1	8.47388	down
201146_at	nuclear factor (erythroid-derived 2)-like 2	NFE2L2	9.01494	down
201147_s_at	TIMP metallopeptidase inhibitor 3 (Sorsby fundus dystrophy, pseudoinflammatory)	TIMP3	1.03608	up
201148_s_at	TIMP metallopeptidase inhibitor 3 (Sorsby fundus dystrophy, pseudoinflammatory)	TIMP3	1.34554	down
201149_s_at	TIMP metallopeptidase inhibitor 3 (Sorsby fundus dystrophy, pseudoinflammatory)	TIMP3	1.13986	up
201150_s_at	TIMP metallopeptidase inhibitor 3 (Sorsby fundus dystrophy, pseudoinflammatory)	TIMP3	6.1516	down
201151_s_at	muscleblind-like (Drosophila)	MBNL1	1.93734	up
201152_s_at	muscleblind-like (Drosophila)	MBNL1	1.02114	up
201153_s_at	muscleblind-like (Drosophila)	MBNL1	1.20306	down
201154_x_at	ribosomal protein L4	RPL4	4.61295	down
201155_s_at	mitofusin 2	MFN2	1.66711	up
201156_s_at	RAB5C, member RAS oncogene family	RAB5C	1.3123	down
201157_s_at	N-myristoyltransferase 1	NMT1	1.6099	down
201158_at	N-myristoyltransferase 1	NMT1	3.46135	down
201159_s_at	N-myristoyltransferase 1	NMT1	4.9866	down
201160_s_at	cold shock domain protein A	CSDA	2.25885	up
201161_s_at	cold shock domain protein A	CSDA	2.71194	up
201162_at	insulin-like growth factor binding protein 7	IGFBP7	45.276	down
201163_s_at	insulin-like growth factor binding protein 7	IGFBP7	26.937	down
201164_s_at	pumilio homolog 1 (Drosophila)	PUM1	3.69719	down
201165_s_at	pumilio homolog 1 (Drosophila)	PUM1	10.678	down
201166_s_at	pumilio homolog 1 (Drosophila)	PUM1	7.32656	down
201167_x_at	Rho GDP dissociation inhibitor (GDI) alpha	ARHGDIA	1.34677	up
201168_x_at	Rho GDP dissociation inhibitor (GDI) alpha	ARHGDIA	1.88743	down
201169_s_at	basic helix-loop-helix domain containing, class B, 2	BHLHB2	1.12609	up
201170_s_at	basic helix-loop-helix domain containing, class B, 2	BHLHB2	16.9496	down
201171_at	ATPase, H+ transporting, lysosomal 9kDa, V0 subunit e	ATP6V0E	1.81783	down
201172_x_at	ATPase, H+ transporting, lysosomal 9kDa, V0 subunit e	ATP6V0E	2.93565	down
201173_x_at	nuclear distribution gene C homolog (A. nidulans)	NUDC	1.07914	up
201174_s_at	telomeric repeat binding factor 2, interacting protein	TERF2IP	1.02138	down
201175_at	thioredoxin domain containing 14	TXNDC14	11.6207	down
201176_s_at	archain 1	ARCN1	6.78549	down
201177_s_at	SUMO-1 activating enzyme subunit 2	UBA2	6.36296	down
201178_at	F-box protein 7	FBXO7	2.00142	up
201179_s_at	guanine nucleotide binding protein (G protein), alpha inhibiting activity polypeptide 3	GNAI3	7.51124	down
201180_s_at	guanine nucleotide binding protein (G protein), alpha inhibiting activity polypeptide 3	GNAI3	8.8699	down
201181_at	guanine nucleotide binding protein (G protein), alpha inhibiting activity polypeptide 3	GNAI3	1.24484	down
201182_s_at	chromodomain helicase DNA binding protein 4	CHD4	2.05818	down
201183_s_at	chromodomain helicase DNA binding protein 4	CHD4	4.82753	down
201184_s_at	chromodomain helicase DNA binding protein 4	CHD4	2.73476	down
201185_at	HtrA serine peptidase 1	HTRA1	39.6938	down
201186_at	low density lipoprotein receptor-related protein associated protein 1	LRPAP1	5.48749	down
201187_s_at	inositol 1,4,5-triphosphate receptor, type 3	ITPR3	1.44897	up
201188_s_at	inositol 1,4,5-triphosphate receptor, type 3	ITPR3	1.1065	up
201189_s_at	inositol 1,4,5-triphosphate receptor, type 3	ITPR3	10.5975	down
201190_s_at	phosphatidylinositol transfer protein, alpha	PITPNA	14.4547	down
201191_at	phosphatidylinositol transfer protein, alpha	PITPNA	18.2389	down
201192_s_at	phosphatidylinositol transfer protein, alpha	PITPNA	4.42406	down
201193_at	isocitrate dehydrogenase 1 (NADP+), soluble	IDH1	6.6009	down
201194_at	selenoprotein W, 1	SEPW1	11.1534	down
201195_s_at	solute carrier family 7 (cationic amino acid transporter, y+ system), member 5	SLC7A5	1.25433	down
201196_s_at	adenosylmethionine decarboxylase 1	AMD1	1.20213	down
201197_at	adenosylmethionine decarboxylase 1	AMD1	1.28866	down
201198_s_at	proteasome (prosome, macropain) 26S subunit, non-ATPase, 1	PSMD1	3.61728	down
201199_s_at	proteasome (prosome, macropain) 26S subunit, non-ATPase, 1	PSMD1	3.61144	down
201200_at	cellular repressor of E1A-stimulated genes 1	CREG1	1.20652	up
201201_at	cystatin B (stefin B)	CSTB	4.36311	down
201202_at	proliferating cell nuclear antigen	PCNA	8.92268	down
201203_s_at	ribosome binding protein 1 homolog 180kDa (dog)	RRBP1	1.09345	up
201204_s_at	Ribosome binding protein 1 homolog 180kDa (dog)	RRBP1	30.2737	down
201205_at			1.00849	up
201206_s_at	ribosome binding protein 1 homolog 180kDa (dog)	RRBP1	6.66435	down
201207_at	tumor necrosis factor, alpha-induced protein 1 (endothelial)	TNFAIP1	25.0477	down
201208_s_at	tumor necrosis factor, alpha-induced protein 1 (endothelial)	TNFAIP1	1.57446	up
201209_at	histone deacetylase 1	HDAC1	4.03726	down
201210_at	DEAD (Asp-Glu-Ala-Asp) box polypeptide 3, X-linked	DDX3X	2.82957	down
201211_s_at	DEAD (Asp-Glu-Ala-Asp) box polypeptide 3, X-linked	DDX3X	1.10593	up
201212_at	legumain	LGMN	5.18252	down
201213_at			1.06935	down
201214_s_at	protein phosphatase 1, regulatory subunit 7	PPP1R7	4.21715	down
201215_at	plastin 3 (T isoform)	PLS3	192.963	down
201216_at	endoplasmic reticulum protein 29	ERP29	5.05671	down
201217_x_at	ribosomal protein L3	RPL3	3.91939	down
201218_at	C-terminal binding protein 2 /// similar to C-terminal binding protein 2 /// similar to C-terminal binding protein 2 /// similar to C-terminal binding protein 2	CTBP2 /// LOC645291 /// LOC645508 /// LOC650999	6.78386	down
201219_at	C-terminal binding protein 2 /// similar to C-terminal binding protein 2 /// similar to C-terminal binding protein 2	CTBP2 /// LOC645291 /// LOC650999	2.35668	down
201220_x_at	C-terminal binding protein 2	CTBP2	2.93225	down
201221_s_at	small nuclear ribonucleoprotein 70kDa polypeptide (RNP antigen)	SNRP70	5.3553	down
201222_s_at	RAD23 homolog B (S. cerevisiae)	RAD23B	3.32823	down
201223_s_at	RAD23 homolog B (S. cerevisiae)	RAD23B	3.55352	down
201224_s_at	serine/arginine repetitive matrix 1	SRRM1	1.19499	up
201225_s_at	serine/arginine repetitive matrix 1	SRRM1	5.3885	down
201226_at	NADH dehydrogenase (ubiquinone) 1 beta subcomplex, 8, 19kDa	NDUFB8	5.32258	down
201227_s_at	NADH dehydrogenase (ubiquinone) 1 beta subcomplex, 8, 19kDa	NDUFB8	3.36935	down
201228_s_at	ariadne homolog 2 (Drosophila)	ARIH2	2.41387	up
201229_s_at	ariadne homolog 2 (Drosophila)	ARIH2	1.37385	down
201230_s_at	ariadne homolog 2 (Drosophila)	ARIH2	2.67563	down
201231_s_at	enolase 1, (alpha)	ENO1	3.03729	down
201232_s_at	proteasome (prosome, macropain) 26S subunit, non-ATPase, 13	PSMD13	3.18453	down
201233_at	proteasome (prosome, macropain) 26S subunit, non-ATPase, 13	PSMD13	4.92769	down
201234_at	integrin-linked kinase	ILK	1.07039	up
201235_s_at	BTG family, member 2	BTG2	1.37983	down
201236_s_at	BTG family, member 2	BTG2	19.1789	down
201237_at	capping protein (actin filament) muscle Z-line, alpha 2	CAPZA2	2.58719	down
201238_s_at	capping protein (actin filament) muscle Z-line, alpha 2	CAPZA2	4.47013	down
201239_s_at	signal peptidase complex subunit 2 homolog (S. cerevisiae) /// similar to Signal peptidase complex subunit 2 (Microsomal signal peptidase 25 kDa subunit) (SPase 25 kDa subunit)	SPCS2 /// LOC653566	5.47796	down
201240_s_at	signal peptidase complex subunit 2 homolog (S. cerevisiae)	SPCS2	9.83769	down
201241_at	DEAD (Asp-Glu-Ala-Asp) box polypeptide 1	DDX1	20.3042	down
201242_s_at	ATPase, Na+/K+ transporting, beta 1 polypeptide	ATP1B1	2.18841	down
201243_s_at	ATPase, Na+/K+ transporting, beta 1 polypeptide	ATP1B1	1.13844	down
201244_s_at	v-raf-1 murine leukemia viral oncogene homolog 1	RAF1	3.56151	down
201245_s_at	OTU domain, ubiquitin aldehyde binding 1	OTUB1	1.12951	up
201246_s_at	OTU domain, ubiquitin aldehyde binding 1	OTUB1	5.11454	down
201247_at			1.11247	up
201248_s_at	sterol regulatory element binding transcription factor 2	SREBF2	1.40402	up
201249_at	solute carrier family 2 (facilitated glucose transporter), member 1	SLC2A1	1.32466	up
201250_s_at	solute carrier family 2 (facilitated glucose transporter), member 1	SLC2A1	2.11666	down
201251_at	pyruvate kinase, muscle	PKM2	1.09241	up
201252_at	proteasome (prosome, macropain) 26S subunit, ATPase, 4 /// similar to 26S protease regulatory subunit 6B (MIP224) (MB67-interacting protein) (TAT-binding protein 7) (TBP-7)	PSMC4 /// LOC652826	1.92436	down
201253_s_at	CDP-diacylglycerol--inositol 3-phosphatidyltransferase (phosphatidylinositol synthase)	CDIPT	1.63455	down
201254_x_at	ribosomal protein S6	RPS6	3.55528	down
201255_x_at	HLA-B associated transcript 3	BAT3	1.92247	up
201256_at	cytochrome c oxidase subunit VIIa polypeptide 2 like	COX7A2L	3.35177	down
201257_x_at	ribosomal protein S3A	RPS3A	2.43441	down
201258_at	ribosomal protein S16	RPS16	5.52275	down
201259_s_at	synaptophysin-like 1	SYPL1	3.41699	down
201260_s_at	synaptophysin-like 1	SYPL1	8.91242	down
201261_x_at	biglycan	BGN	112.574	down
201262_s_at	biglycan	BGN	1.083	up
201263_at	threonyl-tRNA synthetase	TARS	4.48221	down
201264_at	coatomer protein complex, subunit epsilon	COPE	1.20596	down
201265_at			1.37346	down
201266_at	thioredoxin reductase 1	TXNRD1	5.26412	down
201267_s_at	proteasome (prosome, macropain) 26S subunit, ATPase, 3	PSMC3	4.92325	down
201268_at	non-metastatic cells 2, protein (NM23B) expressed in /// NM23-LV	NME2 /// NME1-NME2	12.036	down
201269_s_at	NudC domain containing 3	NUDCD3	1.10265	up
201270_x_at	NudC domain containing 3	NUDCD3	3.8883	down
201271_s_at	RNA binding protein, autoantigenic (hnRNP-associated with lethal yellow homolog (mouse))	RALY	1.38138	down
201272_at	aldo-keto reductase family 1, member B1 (aldose reductase)	AKR1B1	3.5214	down
201273_s_at	signal recognition particle 9kDa	SRP9	5.67758	down
201274_at	proteasome (prosome, macropain) subunit, alpha type, 5	PSMA5	6.02772	down
201275_at	farnesyl diphosphate synthase (farnesyl pyrophosphate synthetase, dimethylallyltranstransferase, geranyltranstransferase)	FDPS	6.42096	down
201276_at	RAB5B, member RAS oncogene family	RAB5B	1.32362	down
201277_s_at	heterogeneous nuclear ribonucleoprotein A/B	HNRPAB	9.31378	down
201278_at	Disabled homolog 2, mitogen-responsive phosphoprotein (Drosophila)	DAB2	2.90188	down
201279_s_at	disabled homolog 2, mitogen-responsive phosphoprotein (Drosophila)	DAB2	1.12056	up
201280_s_at	disabled homolog 2, mitogen-responsive phosphoprotein (Drosophila)	DAB2	1.79025	down
201281_at	adhesion regulating molecule 1	ADRM1	1.13855	up
201282_at	oxoglutarate (alpha-ketoglutarate) dehydrogenase (lipoamide)	OGDH	1.55831	down
201283_s_at	trafficking protein, kinesin binding 1	TRAK1	1.38462	up
201284_s_at	N-acylaminoacyl-peptide hydrolase	APEH	2.19655	down
201285_at	makorin, ring finger protein, 1 /// makorin, ring finger protein, 1	MKRN1	1.90986	up
201286_at	syndecan 1	SDC1	1.34713	up
201287_s_at	syndecan 1	SDC1	1.24629	up
201288_at	Rho GDP dissociation inhibitor (GDI) beta	ARHGDIB	1.05543	down
201289_at	cysteine-rich, angiogenic inducer, 61	CYR61	158.65	down
201290_at	SEC11-like 1 (S. cerevisiae)	SEC11L1	6.01592	down
201291_s_at	topoisomerase (DNA) II alpha 170kDa	TOP2A	2.14629	up
201292_at	topoisomerase (DNA) II alpha 170kDa	TOP2A	3.09635	down
201293_x_at	peptidylprolyl isomerase A (cyclophilin A)	PPIA	6.37838	down
201294_s_at	WD repeat and SOCS box-containing 1	WSB1	6.31097	down
201295_s_at	WD repeat and SOCS box-containing 1	WSB1	3.77231	down
201296_s_at	WD repeat and SOCS box-containing 1	WSB1	18.2637	down
201297_s_at	MOB1, Mps One Binder kinase activator-like 1B (yeast)	MOBK1B	1.32394	down
201298_s_at	MOB1, Mps One Binder kinase activator-like 1B (yeast)	MOBK1B	1.2729	down
201299_s_at	MOB1, Mps One Binder kinase activator-like 1B (yeast)	MOBK1B	1.02201	down
201300_s_at	prion protein (p27-30) (Creutzfeldt-Jakob disease, Gerstmann-Strausler-Scheinker syndrome, fatal familial insomnia)	PRNP	3.31379	down
201301_s_at	annexin A4	ANXA4	7.82169	down
201302_at	annexin A4	ANXA4	6.33149	down
201303_at	DEAD (Asp-Glu-Ala-Asp) box polypeptide 48	DDX48	6.05061	down
201304_at	NADH dehydrogenase (ubiquinone) 1 alpha subcomplex, 5, 13kDa	NDUFA5	2.73214	down
201305_x_at	acidic (leucine-rich) nuclear phosphoprotein 32 family, member B	ANP32B	1.5136	up
201306_s_at	acidic (leucine-rich) nuclear phosphoprotein 32 family, member B	ANP32B	1.04581	up
201307_at	septin 11	2008-09-11	7.92425	down
201308_s_at	septin 11	2008-09-11	4.52075	up
201309_x_at	chromosome 5 open reading frame 13	C5orf13	1.58315	up
201310_s_at	chromosome 5 open reading frame 13	C5orf13	8.76768	down
201311_s_at	SH3 domain binding glutamic acid-rich protein like	SH3BGRL	1.00786	up
201312_s_at	SH3 domain binding glutamic acid-rich protein like	SH3BGRL	1.13207	down
201313_at	enolase 2 (gamma, neuronal)	ENO2	1.2322	up
201314_at	serine/threonine kinase 25 (STE20 homolog, yeast)	STK25	1.32435	down
201315_x_at	interferon induced transmembrane protein 2 (1-8D)	IFITM2	7.72145	down
201316_at	proteasome (prosome, macropain) subunit, alpha type, 2	PSMA2	1.0579	up
201317_s_at	proteasome (prosome, macropain) subunit, alpha type, 2	PSMA2	7.1493	down
201318_s_at	myosin regulatory light chain MRCL3 /// myosin regulatory light chain MRLC2	MRCL3 /// MRLC2	1.97986	down
201319_at	myosin regulatory light chain MRCL3	MRCL3	1.05486	down
201320_at	SWI/SNF related, matrix associated, actin dependent regulator of chromatin, subfamily c, member 2	SMARCC2	1.15791	up
201321_s_at	SWI/SNF related, matrix associated, actin dependent regulator of chromatin, subfamily c, member 2	SMARCC2	2.40175	down
201322_at	ATP synthase, H+ transporting, mitochondrial F1 complex, beta polypeptide	ATP5B	1.77738	down
201323_at	EBNA1 binding protein 2	EBNA1BP2	6.38468	down
201324_at	epithelial membrane protein 1	EMP1	71.9473	down
201325_s_at	epithelial membrane protein 1	EMP1	53.4815	down
201326_at	chaperonin containing TCP1, subunit 6A (zeta 1)	CCT6A	19.5446	down
201327_s_at	chaperonin containing TCP1, subunit 6A (zeta 1)	CCT6A	8.02847	down
201328_at	v-ets erythroblastosis virus E26 oncogene homolog 2 (avian)	ETS2	3.68363	down
201329_s_at	v-ets erythroblastosis virus E26 oncogene homolog 2 (avian)	ETS2	9.07846	down
201330_at	arginyl-tRNA synthetase	RARS	9.85264	down
201331_s_at	signal transducer and activator of transcription 6, interleukin-4 induced	STAT6	1.81265	down
201332_s_at	signal transducer and activator of transcription 6, interleukin-4 induced	STAT6	1.17569	up
201333_s_at	Rho guanine nucleotide exchange factor (GEF) 12	ARHGEF12	2.72969	up
201334_s_at	Rho guanine nucleotide exchange factor (GEF) 12	ARHGEF12	1.72535	down
201335_s_at	Rho guanine nucleotide exchange factor (GEF) 12	ARHGEF12	1.14401	up
201336_at	vesicle-associated membrane protein 3 (cellubrevin)	VAMP3	7.9644	down
201337_s_at	vesicle-associated membrane protein 3 (cellubrevin)	VAMP3	5.69431	down
201338_x_at	general transcription factor IIIA	GTF3A	2.02408	down
201339_s_at	sterol carrier protein 2	SCP2	5.14926	down
201340_s_at	ectodermal-neural cortex (with BTB-like domain)	ENC1	1.21603	up
201341_at	ectodermal-neural cortex (with BTB-like domain)	ENC1	1.24695	down
201342_at	small nuclear ribonucleoprotein polypeptide C	SNRPC	1.16494	down
201343_at	ubiquitin-conjugating enzyme E2D 2 (UBC4/5 homolog, yeast)	UBE2D2	4.0967	down
201344_at	ubiquitin-conjugating enzyme E2D 2 (UBC4/5 homolog, yeast)	UBE2D2	2.54043	down
201345_s_at	ubiquitin-conjugating enzyme E2D 2 (UBC4/5 homolog, yeast)	UBE2D2	2.23737	down
201346_at	adiponectin receptor 2	ADIPOR2	2.62404	down
201347_x_at	glyoxylate reductase/hydroxypyruvate reductase	GRHPR	2.51993	down
201348_at	glutathione peroxidase 3 (plasma)	GPX3	3.88132	down
201349_at	solute carrier family 9 (sodium/hydrogen exchanger), member 3 regulator 1	SLC9A3R1	1.32748	up
201350_at	flotillin 2	FLOT2	3.64043	down
201351_s_at	YME1-like 1 (S. cerevisiae)	YME1L1	3.75399	down
201352_at	YME1-like 1 (S. cerevisiae)	YME1L1	9.05857	down
201353_s_at	bromodomain adjacent to zinc finger domain, 2A	BAZ2A	1.18235	down
201354_s_at	bromodomain adjacent to zinc finger domain, 2A	BAZ2A	2.22875	down
201355_s_at	bromodomain adjacent to zinc finger domain, 2A	BAZ2A	1.27621	up
201356_at	splicing factor 3a, subunit 1, 120kDa	SF3A1	1.81402	down
201357_s_at	splicing factor 3a, subunit 1, 120kDa	SF3A1	1.30078	up
201358_s_at	coatomer protein complex, subunit beta	COPB	11.4193	down
201359_at	coatomer protein complex, subunit beta	COPB	8.60943	down
201360_at	cystatin C (amyloid angiopathy and cerebral hemorrhage)	CST3	1.23436	down
201361_at	transmembrane protein 109	TMEM109	14.1499	down
201362_at	influenza virus NS1A binding protein	IVNS1ABP	2.20691	down
201363_s_at	influenza virus NS1A binding protein	IVNS1ABP	1.99013	down
201364_s_at	ornithine decarboxylase antizyme 2	OAZ2	1.47482	up
201365_at	ornithine decarboxylase antizyme 2	OAZ2	1.1385	up
201366_at	annexin A7	ANXA7	3.58537	down
201367_s_at	zinc finger protein 36, C3H type-like 2	ZFP36L2	1.14977	down
201368_at	zinc finger protein 36, C3H type-like 2	ZFP36L2	4.20283	down
201369_s_at	zinc finger protein 36, C3H type-like 2	ZFP36L2	4.452	down
201370_s_at	cullin 3	CUL3	11.856	down
201371_s_at	cullin 3	CUL3	3.6282	down
201372_s_at	cullin 3	CUL3	1.30612	up
201373_at	plectin 1, intermediate filament binding protein 500kDa	PLEC1	2.60265	down
201374_x_at	protein phosphatase 2 (formerly 2A), catalytic subunit, beta isoform	PPP2CB	1.09102	up
201375_s_at	protein phosphatase 2 (formerly 2A), catalytic subunit, beta isoform	PPP2CB	15.37	down
201376_s_at	heterogeneous nuclear ribonucleoprotein F	HNRPF	3.84715	down
201377_at	ubiquitin associated protein 2-like	UBAP2L	2.01297	down
201378_s_at	ubiquitin associated protein 2-like	UBAP2L	1.26632	up
201379_s_at	tumor protein D52-like 2	TPD52L2	4.87701	down
201380_at	cartilage associated protein	CRTAP	3.75468	down
201381_x_at	calcyclin binding protein	CACYBP	1.54454	down
201382_at	calcyclin binding protein	CACYBP	1.83261	up
201383_s_at	neighbor of BRCA1 gene 1 /// similar to neighbor of BRCA1 gene 1	NBR1 /// LOC653347	1.04153	down
201384_s_at	neighbor of BRCA1 gene 1 /// similar to neighbor of BRCA1 gene 1	NBR1 /// LOC653347	3.36705	down
201385_at	DEAH (Asp-Glu-Ala-His) box polypeptide 15	DHX15	8.3932	down
201386_s_at	DEAH (Asp-Glu-Ala-His) box polypeptide 15	DHX15	6.96284	down
201387_s_at	ubiquitin carboxyl-terminal esterase L1 (ubiquitin thiolesterase)	UCHL1	2.44302	down
201388_at	proteasome (prosome, macropain) 26S subunit, non-ATPase, 3	PSMD3	3.80223	down
201389_at	integrin, alpha 5 (fibronectin receptor, alpha polypeptide)	ITGA5	2.21938	down
201390_s_at	casein kinase 2, beta polypeptide	CSNK2B	3.39393	down
201391_at	TNF receptor-associated protein 1	TRAP1	1.95585	down
201392_s_at	insulin-like growth factor 2 receptor	IGF2R	1.1516	up
201393_s_at	insulin-like growth factor 2 receptor	IGF2R	2.78395	down
201394_s_at	RNA binding motif protein 5	RBM5	22.237	down
201395_at	RNA binding motif protein 5	RBM5	7.00592	down
201396_s_at	small glutamine-rich tetratricopeptide repeat (TPR)-containing, alpha	SGTA	1.25869	up
201397_at	phosphoglycerate dehydrogenase	PHGDH	1.48912	down
201398_s_at	translocation associated membrane protein 1	TRAM1	3.76052	down
201399_s_at	translocation associated membrane protein 1	TRAM1	1.21852	down
201400_at	proteasome (prosome, macropain) subunit, beta type, 3	PSMB3	3.85875	down
201401_s_at	adrenergic, beta, receptor kinase 1	ADRBK1	5.25443	down
201402_at	adrenergic, beta, receptor kinase 1	ADRBK1	1.17009	up
201403_s_at	microsomal glutathione S-transferase 3	MGST3	7.82602	down
201404_x_at	proteasome (prosome, macropain) subunit, beta type, 2	PSMB2	1.59119	up
201405_s_at	COP9 constitutive photomorphogenic homolog subunit 6 (Arabidopsis)	COPS6	4.51774	down
201406_at	ribosomal protein L36a /// similar to large subunit ribosomal protein L36a	RPL36A /// LOC644889	4.38966	down
201407_s_at	protein phosphatase 1, catalytic subunit, beta isoform	PPP1CB	1.0684	up
201408_at	protein phosphatase 1, catalytic subunit, beta isoform	PPP1CB	2.15233	down
201409_s_at	protein phosphatase 1, catalytic subunit, beta isoform	PPP1CB	1.31309	down
201410_at	Pleckstrin homology domain containing, family B (evectins) member 2	PLEKHB2	2.27015	down
201411_s_at	pleckstrin homology domain containing, family B (evectins) member 2	PLEKHB2	1.03856	up
201412_at	low density lipoprotein receptor-related protein 10	LRP10	1.40699	down
201413_at	hydroxysteroid (17-beta) dehydrogenase 4	HSD17B4	4.332	down
201414_s_at	nucleosome assembly protein 1-like 4	NAP1L4	1.68502	up
201415_at	glutathione synthetase	GSS	1.3521	down
201416_at	SRY (sex determining region Y)-box 4	SOX4	27.9609	down
201417_at	SRY (sex determining region Y)-box 4	SOX4	22.1383	down
201418_s_at	SRY (sex determining region Y)-box 4	SOX4	3.99274	down
201419_at	BRCA1 associated protein-1 (ubiquitin carboxy-terminal hydrolase)	BAP1	1.62649	down
201420_s_at	WD repeat domain 77	WDR77	1.2048	down
201421_s_at	WD repeat domain 77	WDR77	1.05996	up
201422_at	interferon, gamma-inducible protein 30	IFI30	1.01881	up
201423_s_at	cullin 4A	CUL4A	1.38909	up
201424_s_at	cullin 4A	CUL4A	1.32795	down
201425_at	aldehyde dehydrogenase 2 family (mitochondrial)	ALDH2	7.29275	down
201426_s_at	vimentin	VIM	9.04603	down
201427_s_at	selenoprotein P, plasma, 1	SEPP1	77.0685	down
201428_at	claudin 4	CLDN4	3.59993	up
201429_s_at	polo-like kinase 1 (Drosophila) /// ribosomal protein L37a	PLK1 /// RPL37A	2.29434	down
201430_s_at	dihydropyrimidinase-like 3	DPYSL3	1.73771	down
201431_s_at	dihydropyrimidinase-like 3	DPYSL3	75.5472	down
201432_at	catalase	CAT	1.75462	down
201433_s_at	phosphatidylserine synthase 1	PTDSS1	4.97668	down
201434_at	tetratricopeptide repeat domain 1	TTC1	1.69218	down
201435_s_at	eukaryotic translation initiation factor 4E	EIF4E	1.68992	down
201436_at	eukaryotic translation initiation factor 4E /// similar to eukaryotic translation initiation factor 4E	EIF4E /// LOC644751	2.49543	down
201437_s_at	eukaryotic translation initiation factor 4E	EIF4E	3.99675	down
201438_at	collagen, type VI, alpha 3	COL6A3	2.37034	down
201439_at	golgi-specific brefeldin A resistance factor 1	GBF1	1.71329	down
201440_at	DEAD (Asp-Glu-Ala-Asp) box polypeptide 23	DDX23	4.562	down
201441_at	cytochrome c oxidase subunit Vib polypeptide 1 (ubiquitous)	COX6B1	1.2193	down
201442_s_at	ATPase, H+ transporting, lysosomal accessory protein 2	ATP6AP2	2.41078	up
201443_s_at	ATPase, H+ transporting, lysosomal accessory protein 2	ATP6AP2	4.44711	down
201444_s_at	ATPase, H+ transporting, lysosomal accessory protein 2	ATP6AP2	2.50884	down
201445_at	calponin 3, acidic	CNN3	24.0087	down
201446_s_at	TIA1 cytotoxic granule-associated RNA binding protein	TIA1	3.47316	down
201447_at	TIA1 cytotoxic granule-associated RNA binding protein	TIA1	1.66942	down
201448_at	TIA1 cytotoxic granule-associated RNA binding protein	TIA1	14.6132	down
201449_at	TIA1 cytotoxic granule-associated RNA binding protein	TIA1	4.35671	down
201450_s_at	TIA1 cytotoxic granule-associated RNA binding protein	TIA1	6.36823	down
201451_x_at	Ras homolog enriched in brain	RHEB	1.79284	up
201452_at	Ras homolog enriched in brain	RHEB	1.49022	up
201453_x_at	Ras homolog enriched in brain	RHEB	4.1686	down
201454_s_at	aminopeptidase puromycin sensitive /// region containing aminopeptidase puromycin sensitive; hypothetical protein FLJ11822	NPEPPS /// LOC649270	2.98691	down
201455_s_at	aminopeptidase puromycin sensitive /// region containing aminopeptidase puromycin sensitive; hypothetical protein FLJ11822	NPEPPS /// LOC649270	7.42786	down
201456_s_at	BUB3 budding uninhibited by benzimidazoles 3 homolog (yeast)	BUB3	3.98188	down
201457_x_at	BUB3 budding uninhibited by benzimidazoles 3 homolog (yeast)	BUB3	2.95912	down
201458_s_at	BUB3 budding uninhibited by benzimidazoles 3 homolog (yeast)	BUB3	5.0227	down
201459_at	RuvB-like 2 (E. coli)	RUVBL2	1.01561	up
201460_at	mitogen-activated protein kinase-activated protein kinase 2	MAPKAPK2	1.03149	down
201461_s_at	mitogen-activated protein kinase-activated protein kinase 2	MAPKAPK2	1.90415	down
201462_at	secernin 1	SCRN1	1.02906	down
201463_s_at	transaldolase 1	TALDO1	1.36639	up
201464_x_at	v-jun sarcoma virus 17 oncogene homolog (avian)	JUN	60.5038	down
201465_s_at	v-jun sarcoma virus 17 oncogene homolog (avian)	JUN	3.63184	down
201466_s_at	v-jun sarcoma virus 17 oncogene homolog (avian)	JUN	79.9908	down
201467_s_at	NAD(P)H dehydrogenase, quinone 1	NQO1	2.10903	up
201468_s_at	NAD(P)H dehydrogenase, quinone 1	NQO1	1.03558	up
201469_s_at	SHC (Src homology 2 domain containing) transforming protein 1	SHC1	1.16961	down
201470_at	glutathione S-transferase omega 1	GSTO1	1.87945	down
201471_s_at	sequestosome 1	SQSTM1	1.27784	down
201472_at	von Hippel-Lindau binding protein 1	VBP1	3.71599	down
201473_at	jun B proto-oncogene	JUNB	11.4612	down
201474_s_at	integrin, alpha 3 (antigen CD49C, alpha 3 subunit of VLA-3 receptor)	ITGA3	3.37075	down
201475_x_at	methionine-tRNA synthetase	MARS	2.92096	down
201476_s_at	ribonucleotide reductase M1 polypeptide	RRM1	2.724	down
201477_s_at	ribonucleotide reductase M1 polypeptide	RRM1	22.6221	down
201478_s_at	dyskeratosis congenita 1, dyskerin	DKC1	3.28385	down
201479_at	dyskeratosis congenita 1, dyskerin	DKC1	7.09228	down
201480_s_at	suppressor of Ty 5 homolog (S. cerevisiae)	SUPT5H	1.145	down
201481_s_at	phosphorylase, glycogen; brain	PYGB	1.23067	down
201482_at	quiescin Q6	QSCN6	11.6923	down
201483_s_at	suppressor of Ty 4 homolog 1 (S. cerevisiae)	SUPT4H1	1.2034	down
201484_at	suppressor of Ty 4 homolog 1 (S. cerevisiae)	SUPT4H1	1.58197	down
201485_s_at	reticulocalbin 2, EF-hand calcium binding domain	RCN2	13.5053	down
201486_at	reticulocalbin 2, EF-hand calcium binding domain	RCN2	90.1394	down
201487_at	cathepsin C	CTSC	2.24585	down
201488_x_at	KH domain containing, RNA binding, signal transduction associated 1	KHDRBS1	5.18481	down
201489_at	peptidylprolyl isomerase F (cyclophilin F)	PPIF	1.29175	down
201490_s_at	peptidylprolyl isomerase F (cyclophilin F)	PPIF	3.2768	down
201491_at	AHA1, activator of heat shock 90kDa protein ATPase homolog 1 (yeast)	AHSA1	2.9873	down
201492_s_at	ribosomal protein L41	RPL41	1.6411	down
201493_s_at	pumilio homolog 2 (Drosophila)	PUM2	2.83505	down
201494_at	prolylcarboxypeptidase (angiotensinase C)	PRCP	25.3978	down
201495_x_at	myosin, heavy polypeptide 11, smooth muscle	MYH11	1.08166	down
201496_x_at	myosin, heavy polypeptide 11, smooth muscle	MYH11	1.17353	up
201497_x_at	myosin, heavy polypeptide 11, smooth muscle	MYH11	1.10978	down
201498_at	ubiquitin specific peptidase 7 (herpes virus-associated)	USP7	2.87175	down
201499_s_at	ubiquitin specific peptidase 7 (herpes virus-associated)	USP7	1.40704	down
201500_s_at	protein phosphatase 1, regulatory (inhibitor) subunit 11	PPP1R11	3.54754	down
201501_s_at	G-rich RNA sequence binding factor 1	GRSF1	4.90227	down
201502_s_at	nuclear factor of kappa light polypeptide gene enhancer in B-cells inhibitor, alpha	NFKBIA	3.7196	down
201503_at	Ras-GTPase-activating protein SH3-domain-binding protein	G3BP	16.0806	down
201504_s_at	translin	TSN	1.64267	up
201505_at	laminin, beta 1	LAMB1	260.849	down
201506_at	transforming growth factor, beta-induced, 68kDa	TGFBI	1.01297	up
201507_at	prefoldin subunit 1	PFDN1	5.80156	down
201508_at	insulin-like growth factor binding protein 4	IGFBP4	265.687	down
201509_at	isocitrate dehydrogenase 3 (NAD+) beta	IDH3B	1.92869	down
201510_at	E74-like factor 3 (ets domain transcription factor, epithelial-specific )	ELF3	1.02355	down
201511_at	angio-associated, migratory cell protein	AAMP	1.32183	down
201512_s_at	translocase of outer mitochondrial membrane 70 homolog A (S. cerevisiae)	TOMM70A	9.25892	down
201513_at	translin	TSN	5.6672	down
201514_s_at	Ras-GTPase-activating protein SH3-domain-binding protein	G3BP	2.24663	down
201515_s_at	translin	TSN	5.48234	down
201516_at	spermidine synthase	SRM	3.74998	down
201517_at	nuclear cap binding protein subunit 2, 20kDa	NCBP2	10.4654	down
201518_at	chromobox homolog 1 (HP1 beta homolog Drosophila )	CBX1	14.9959	down
201519_at	translocase of outer mitochondrial membrane 70 homolog A (S. cerevisiae)	TOMM70A	7.1961	down
201520_s_at	G-rich RNA sequence binding factor 1	GRSF1	1.53155	down
201521_s_at	nuclear cap binding protein subunit 2, 20kDa	NCBP2	5.10318	down
201522_x_at	small nuclear ribonucleoprotein polypeptide N /// SNRPN upstream reading frame	SNRPN /// SNURF	2.30908	down
201523_x_at	ubiquitin-conjugating enzyme E2N (UBC13 homolog, yeast)	UBE2N	1.19046	down
201524_x_at	ubiquitin-conjugating enzyme E2N (UBC13 homolog, yeast)	UBE2N	7.61744	down
201525_at	apolipoprotein D	APOD	1.26721	down
201526_at	ADP-ribosylation factor 5	ARF5	1.5173	up
201527_at	ATPase, H+ transporting, lysosomal 14kDa, V1 subunit F	ATP6V1F	1.55413	down
201528_at	replication protein A1, 70kDa	RPA1	1.10174	up
201529_s_at	replication protein A1, 70kDa	RPA1	1.38615	up
201530_x_at	eukaryotic translation initiation factor 4A, isoform 1	EIF4A1	5.53932	down
201531_at	zinc finger protein 36, C3H type, homolog (mouse)	ZFP36	11.1961	down
201532_at	proteasome (prosome, macropain) subunit, alpha type, 3	PSMA3	7.50073	down
201533_at	catenin (cadherin-associated protein), beta 1, 88kDa	CTNNB1	13.2117	down
201534_s_at	ubiquitin-like 3	UBL3	4.90782	down
201535_at	ubiquitin-like 3	UBL3	3.79383	down
201536_at	dual specificity phosphatase 3 (vaccinia virus phosphatase VH1-related)	DUSP3	5.14261	down
201537_s_at	dual specificity phosphatase 3 (vaccinia virus phosphatase VH1-related)	DUSP3	5.61238	down
201538_s_at	dual specificity phosphatase 3 (vaccinia virus phosphatase VH1-related)	DUSP3	1.0626	down
201539_s_at	four and a half LIM domains 1	FHL1	1.1225	down
201540_at	four and a half LIM domains 1	FHL1	2.25068	down
201541_s_at	zinc finger, HIT type 1	ZNHIT1	3.31819	down
201542_at	SAR1 gene homolog A (S. cerevisiae)	SAR1A	9.23536	down
201543_s_at	SAR1 gene homolog A (S. cerevisiae)	SAR1A	2.22815	down
201544_x_at	poly(A) binding protein, nuclear 1	PABPN1	2.27423	down
201545_s_at	poly(A) binding protein, nuclear 1	PABPN1	1.2447	down
201546_at	thyroid hormone receptor interactor 12	TRIP12	1.1989	up
201547_at	Jumonji, AT rich interactive domain 1B (RBP2-like)	JARID1B	2.53102	up
201548_s_at	Jumonji, AT rich interactive domain 1B (RBP2-like)	JARID1B	6.49031	down
201549_x_at	Jumonji, AT rich interactive domain 1B (RBP2-like)	JARID1B	7.56933	down
201550_x_at	actin, gamma 1	ACTG1	2.70809	down
201551_s_at	lysosomal-associated membrane protein 1	LAMP1	1.34628	up
201552_at	lysosomal-associated membrane protein 1	LAMP1	6.05316	down
201553_s_at	lysosomal-associated membrane protein 1	LAMP1	5.65834	down
201554_x_at	glycogenin 1	GYG1	2.72615	down
201555_at	MCM3 minichromosome maintenance deficient 3 (S. cerevisiae)	MCM3	1.359	up
201556_s_at	vesicle-associated membrane protein 2 (synaptobrevin 2)	VAMP2	3.64632	down
201557_at	vesicle-associated membrane protein 2 (synaptobrevin 2)	VAMP2	1.62803	down
201558_at	RAE1 RNA export 1 homolog (S. pombe)	RAE1	2.09774	down
201559_s_at	chloride intracellular channel 4	CLIC4	1.02977	up
201560_at	chloride intracellular channel 4	CLIC4	7.66798	down
201561_s_at	calsyntenin 1	CLSTN1	1.02024	up
201562_s_at	sorbitol dehydrogenase	SORD	15.4152	down
201563_at	sorbitol dehydrogenase	SORD	9.41105	down
201564_s_at	fascin homolog 1, actin-bundling protein (Strongylocentrotus purpuratus)	FSCN1	2.09562	down
201565_s_at	inhibitor of DNA binding 2, dominant negative helix-loop-helix protein	ID2	3.82636	down
201566_x_at	inhibitor of DNA binding 2, dominant negative helix-loop-helix protein /// inhibitor of DNA binding 2B, dominant negative helix-loop-helix protein	ID2 /// ID2B	3.48104	down
201567_s_at	golgi autoantigen, golgin subfamily a, 4	GOLGA4	7.64136	down
201568_at	ubiquinol-cytochrome c reductase, complex III subunit VII, 9.5kDa	UQCRQ	7.5237	down
201569_s_at	sorting and assembly machinery component 50 homolog (S. cerevisiae)	SAMM50	4.33321	down
201570_at	sorting and assembly machinery component 50 homolog (S. cerevisiae)	SAMM50	11.0264	down
201571_s_at	dCMP deaminase	DCTD	1.22773	up
201572_x_at	dCMP deaminase	DCTD	12.778	down
201573_s_at	eukaryotic translation termination factor 1	ETF1	3.22888	down
201574_at	eukaryotic translation termination factor 1	ETF1	7.67805	down
201575_at	SNW domain containing 1	SNW1	3.99273	down
201576_s_at	galactosidase, beta 1	GLB1	3.54426	down
201577_at	non-metastatic cells 1, protein (NM23A) expressed in	NME1	27.6132	down
201578_at	podocalyxin-like	PODXL	52.3673	down
201579_at	FAT tumor suppressor homolog 1 (Drosophila)	FAT	1.64564	up
201580_s_at	thioredoxin domain containing 13	TXNDC13	2.98485	down
201581_at	thioredoxin domain containing 13	TXNDC13	3.67156	down
201582_at	Sec23 homolog B (S. cerevisiae)	SEC23B	3.40473	down
201583_s_at	Sec23 homolog B (S. cerevisiae)	SEC23B	2.05985	down
201584_s_at	DEAD (Asp-Glu-Ala-Asp) box polypeptide 39	DDX39	2.92225	down
201585_s_at	splicing factor proline/glutamine-rich (polypyrimidine tract binding protein associated)	SFPQ	4.27569	down
201586_s_at	splicing factor proline/glutamine-rich (polypyrimidine tract binding protein associated)	SFPQ	9.02993	down
201587_s_at	interleukin-1 receptor-associated kinase 1	IRAK1	4.3007	down
201588_at	thioredoxin-like 1	TXNL1	2.16585	down
201589_at	SMC1 structural maintenance of chromosomes 1-like 1 (yeast)	SMC1L1	3.08914	down
201590_x_at	annexin A2	ANXA2	12.113	down
201591_s_at	nischarin	NISCH	6.05054	down
201592_at	eukaryotic translation initiation factor 3, subunit 3 gamma, 40kDa	EIF3S3	3.52858	down
201593_s_at	likely ortholog of mouse immediate early response, erythropoietin 4	LEREPO4	5.39973	down
201594_s_at	protein phosphatase 4, regulatory subunit 1	PPP4R1	9.4028	down
201595_s_at	likely ortholog of mouse immediate early response, erythropoietin 4	LEREPO4	4.0703	down
201596_x_at	keratin 18	KRT18	9.54117	down
201597_at	cytochrome c oxidase subunit VIIa polypeptide 2 (liver)	COX7A2	4.77185	down
201598_s_at	inositol polyphosphate phosphatase-like 1	INPPL1	1.44609	down
201599_at	ornithine aminotransferase (gyrate atrophy)	OAT	8.43632	down
201600_at	prohibitin 2	PHB2	5.49303	down
201601_x_at	interferon induced transmembrane protein 1 (9-27)	IFITM1	9.38351	down
201602_s_at	protein phosphatase 1, regulatory (inhibitor) subunit 12A	PPP1R12A	1.13862	up
201603_at	protein phosphatase 1, regulatory (inhibitor) subunit 12A	PPP1R12A	9.57183	down
201604_s_at	protein phosphatase 1, regulatory (inhibitor) subunit 12A	PPP1R12A	4.98697	down
201605_x_at	calponin 2	CNN2	1.06602	up
201606_s_at	PWP1 homolog (S. cerevisiae)	PWP1	7.37884	down
201607_at	PWP1 homolog (S. cerevisiae)	PWP1	3.86751	down
201608_s_at	PWP1 homolog (S. cerevisiae)	PWP1	39.562	down
201609_x_at	isoprenylcysteine carboxyl methyltransferase	ICMT	5.40428	down
201610_at	isoprenylcysteine carboxyl methyltransferase	ICMT	7.5139	down
201611_s_at	isoprenylcysteine carboxyl methyltransferase	ICMT	1.13802	up
201612_at	aldehyde dehydrogenase 9 family, member A1	ALDH9A1	7.44956	down
201613_s_at	adaptor-related protein complex 1, gamma 2 subunit	AP1G2	2.63983	down
201614_s_at	RuvB-like 1 (E. coli)	RUVBL1	2.36816	down
201615_x_at	caldesmon 1	CALD1	1.35864	down
201616_s_at	caldesmon 1	CALD1	29.4011	down
201617_x_at	caldesmon 1	CALD1	57.3464	down
201618_x_at	glycosylphosphatidylinositol anchor attachment protein 1 homolog (yeast)	GPAA1	6.30508	down
201619_at	peroxiredoxin 3	PRDX3	5.92316	down
201620_at	membrane-bound transcription factor peptidase, site 1	MBTPS1	4.95084	down
201621_at	neuroblastoma, suppression of tumorigenicity 1	NBL1	2.62777	down
201622_at	staphylococcal nuclease domain containing 1	SND1	3.01677	down
201623_s_at	aspartyl-tRNA synthetase	DARS	4.28655	down
201624_at	aspartyl-tRNA synthetase	DARS	8.56729	down
201625_s_at	insulin induced gene 1	INSIG1	3.37554	down
201626_at	insulin induced gene 1	INSIG1	6.03108	down
201627_s_at	insulin induced gene 1	INSIG1	4.22175	down
201628_s_at	Ras-related GTP binding A	RRAGA	2.85751	down
201629_s_at	acid phosphatase 1, soluble	ACP1	1.92007	up
201630_s_at	acid phosphatase 1, soluble	ACP1	1.29946	down
201631_s_at	immediate early response 3	IER3	18.7638	down
201632_at	eukaryotic translation initiation factor 2B, subunit 1 alpha, 26kDa	EIF2B1	7.11106	down
201633_s_at	cytochrome b5 type B (outer mitochondrial membrane)	CYB5B	3.38927	down
201634_s_at	cytochrome b5 type B (outer mitochondrial membrane)	CYB5B	4.51017	down
201635_s_at	fragile X mental retardation, autosomal homolog 1	FXR1	1.02648	up
201636_at	fragile X mental retardation, autosomal homolog 1	FXR1	6.19551	down
201637_s_at	fragile X mental retardation, autosomal homolog 1	FXR1	5.90306	down
201638_s_at	cleavage and polyadenylation specific factor 1, 160kDa	CPSF1	1.87899	up
201639_s_at	cleavage and polyadenylation specific factor 1, 160kDa	CPSF1	2.10223	down
201640_x_at	cleft lip and palate associated transmembrane protein 1	CLPTM1	1.00828	up
201641_at	bone marrow stromal cell antigen 2	BST2	3.03035	down
201642_at	interferon gamma receptor 2 (interferon gamma transducer 1)	IFNGR2	5.35036	down
201643_x_at	jumonji domain containing 1B	JMJD1B	4.12283	down
201644_at	tissue specific transplantation antigen P35B	TSTA3	1.69311	up
201645_at	tenascin C (hexabrachion)	TNC	1.60907	down
201646_at	scavenger receptor class B, member 2	SCARB2	2.43615	down
201647_s_at	scavenger receptor class B, member 2	SCARB2	1.347	up
201648_at	Janus kinase 1 (a protein tyrosine kinase)	JAK1	2.29464	down
201649_at	ubiquitin-conjugating enzyme E2L 6	UBE2L6	2.56664	down
201650_at	keratin 19	KRT19	2.0328	up
201651_s_at	protein kinase C and casein kinase substrate in neurons 2	PACSIN2	1.98444	down
201652_at	COP9 constitutive photomorphogenic homolog subunit 5 (Arabidopsis)	COPS5	3.40379	down
201653_at	cornichon homolog (Drosophila)	CNIH	7.01349	down
201654_s_at	heparan sulfate proteoglycan 2 (perlecan)	HSPG2	5.99491	down
201655_s_at	heparan sulfate proteoglycan 2 (perlecan)	HSPG2	1.18826	down
201656_at	integrin, alpha 6	ITGA6	1.29422	down
201657_at	ADP-ribosylation factor-like 1	ARL1	7.77719	down
201658_at	ADP-ribosylation factor-like 1	ARL1	16.6776	down
201659_s_at	ADP-ribosylation factor-like 1	ARL1	2.83279	down
201660_at	Acyl-CoA synthetase long-chain family member 3	ACSL3	11.0505	down
201661_s_at	acyl-CoA synthetase long-chain family member 3	ACSL3	8.22818	down
201662_s_at	acyl-CoA synthetase long-chain family member 3	ACSL3	6.14496	down
201663_s_at	SMC4 structural maintenance of chromosomes 4-like 1 (yeast)	SMC4L1	1.47741	down
201664_at	SMC4 structural maintenance of chromosomes 4-like 1 (yeast)	SMC4L1	3.87697	down
201665_x_at	ribosomal protein S17	RPS17	3.96969	down
201666_at	TIMP metallopeptidase inhibitor 1	TIMP1	6.17115	down
201667_at	gap junction protein, alpha 1, 43kDa (connexin 43)	GJA1	85.5022	down
201668_x_at	myristoylated alanine-rich protein kinase C substrate	MARCKS	1.34061	up
201669_s_at	myristoylated alanine-rich protein kinase C substrate	MARCKS	19.4909	down
201670_s_at	myristoylated alanine-rich protein kinase C substrate	MARCKS	6.75788	down
201671_x_at	ubiquitin specific peptidase 14 (tRNA-guanine transglycosylase)	USP14	2.11266	down
201672_s_at	ubiquitin specific peptidase 14 (tRNA-guanine transglycosylase)	USP14	2.6326	down
201673_s_at	glycogen synthase 1 (muscle)	GYS1	1.54172	up
201674_s_at	A kinase (PRKA) anchor protein 1	AKAP1	1.13057	down
201675_at	A kinase (PRKA) anchor protein 1	AKAP1	11.4697	down
201676_x_at	proteasome (prosome, macropain) subunit, alpha type, 1	PSMA1	5.41294	down
201677_at	Chromosome 3 open reading frame 37	C3orf37	1.05815	down
201678_s_at	chromosome 3 open reading frame 37	C3orf37	4.1743	down
201679_at	ARS2 protein	ARS2	1.44684	up
201680_x_at	ARS2 protein	ARS2	4.63118	down
201681_s_at	discs, large homolog 5 (Drosophila)	DLG5	2.12585	up
201682_at	peptidase (mitochondrial processing) beta	PMPCB	5.17989	down
201683_x_at	chromosome 14 open reading frame 92	C14orf92	1.03332	down
201684_s_at	chromosome 14 open reading frame 92	C14orf92	1.31633	up
201685_s_at	chromosome 14 open reading frame 92	C14orf92	1.97353	down
201686_x_at	apoptosis inhibitor 5	API5	1.88154	up
201687_s_at	apoptosis inhibitor 5	API5	7.15945	down
201688_s_at	tumor protein D52	TPD52	2.01746	down
201689_s_at	tumor protein D52	TPD52	3.74315	down
201690_s_at	tumor protein D52	TPD52	22.6099	down
201691_s_at	tumor protein D52	TPD52	1.01999	down
201692_at	opioid receptor, sigma 1	OPRS1	1.7283	down
201693_s_at	early growth response 1	EGR1	103.484	down
201694_s_at	early growth response 1	EGR1	65.8335	down
201695_s_at	nucleoside phosphorylase	NP	1.04618	down
201696_at	splicing factor, arginine/serine-rich 4	SFRS4	5.32494	down
201697_s_at	DNA (cytosine-5-)-methyltransferase 1	DNMT1	2.4781	down
201698_s_at	splicing factor, arginine/serine-rich 9	SFRS9	5.84496	down
201699_at	proteasome (prosome, macropain) 26S subunit, ATPase, 6	PSMC6	6.54382	down
201700_at	cyclin D3	CCND3	1.39132	up
201701_s_at	progesterone receptor membrane component 2	PGRMC2	20.1109	down
201702_s_at	protein phosphatase 1, regulatory subunit 10	PPP1R10	3.18774	down
201703_s_at	protein phosphatase 1, regulatory subunit 10	PPP1R10	3.4618	down
201704_at	ectonucleoside triphosphate diphosphohydrolase 6 (putative function)	ENTPD6	1.94302	down
201705_at	proteasome (prosome, macropain) 26S subunit, non-ATPase, 7 (Mov34 homolog)	PSMD7	4.34528	down
201706_s_at	peroxisomal biogenesis factor 19	PEX19	2.10281	down
201707_at	peroxisomal biogenesis factor 19	PEX19	7.00351	down
201708_s_at	nipsnap homolog 1 (C. elegans)	NIPSNAP1	1.3581	up
201709_s_at	nipsnap homolog 1 (C. elegans)	NIPSNAP1	2.18822	down
201710_at	v-myb myeloblastosis viral oncogene homolog (avian)-like 2	MYBL2	1.23793	up
201711_x_at	RAN binding protein 2	RANBP2	1.12051	down
201712_s_at	RAN binding protein 2	RANBP2	2.03247	down
201713_s_at	RAN binding protein 2	RANBP2	7.54028	down
201714_at	tubulin, gamma 1	TUBG1	5.68326	down
201715_s_at	apoptotic chromatin condensation inducer 1	ACIN1	3.23314	down
201716_at	sorting nexin 1	SNX1	2.15377	down
201717_at	mitochondrial ribosomal protein L49	MRPL49	5.58993	down
201718_s_at	erythrocyte membrane protein band 4.1-like 2	EPB41L2	1.58746	down
201719_s_at	erythrocyte membrane protein band 4.1-like 2	EPB41L2	2.84334	down
201720_s_at	lysosomal associated multispanning membrane protein 5	LAPTM5	1.02354	up
201721_s_at	lysosomal associated multispanning membrane protein 5	LAPTM5	1.21198	down
201722_s_at	UDP-N-acetyl-alpha-D-galactosamine:polypeptide N-acetylgalactosaminyltransferase 1 (GalNAc-T1)	GALNT1	9.02015	down
201723_s_at	UDP-N-acetyl-alpha-D-galactosamine:polypeptide N-acetylgalactosaminyltransferase 1 (GalNAc-T1)	GALNT1	5.79445	down
201724_s_at	UDP-N-acetyl-alpha-D-galactosamine:polypeptide N-acetylgalactosaminyltransferase 1 (GalNAc-T1)	GALNT1	6.07949	down
201725_at	chromosome 10 open reading frame 7	C10orf7	3.77025	down
201726_at	ELAV (embryonic lethal, abnormal vision, Drosophila)-like 1 (Hu antigen R)	ELAVL1	4.14321	down
201727_s_at	ELAV (embryonic lethal, abnormal vision, Drosophila)-like 1 (Hu antigen R)	ELAVL1	5.61161	down
201728_s_at	KIAA0100	KIAA0100	2.17318	down
201729_s_at	KIAA0100	KIAA0100	2.28163	down
201730_s_at	translocated promoter region (to activated MET oncogene)	TPR	11.7408	down
201731_s_at	translocated promoter region (to activated MET oncogene)	TPR	6.88492	down
201732_s_at	chloride channel 3	CLCN3	1.09996	up
201733_at	chloride channel 3	CLCN3	1.22144	down
201734_at	Chloride channel 3	CLCN3	1.99235	down
201735_s_at	chloride channel 3	CLCN3	1.0738	down
201736_s_at	membrane-associated ring finger (C3HC4) 6	2008-03-06	1.18404	up
201737_s_at	membrane-associated ring finger (C3HC4) 6	2008-03-06	1.28277	down
201738_at	eukaryotic translation initiation factor 1B	EIF1B	1.45234	up
201739_at	serum/glucocorticoid regulated kinase	SGK	3.79077	down
201740_at	NADH dehydrogenase (ubiquinone) Fe-S protein 3, 30kDa (NADH-coenzyme Q reductase)	NDUFS3	3.75233	down
201741_x_at	splicing factor, arginine/serine-rich 1 (splicing factor 2, alternate splicing factor)	SFRS1	1.41102	up
201742_x_at	splicing factor, arginine/serine-rich 1 (splicing factor 2, alternate splicing factor)	SFRS1	1.52711	down
201743_at	CD14 molecule /// CD14 molecule	CD14	1.15624	up
201744_s_at	lumican	LUM	39.5907	down
201745_at	PTK9 protein tyrosine kinase 9	PTK9	5.25057	down
201746_at	tumor protein p53 (Li-Fraumeni syndrome)	TP53	4.30145	down
201747_s_at	scaffold attachment factor B	SAFB	1.33535	up
201748_s_at	scaffold attachment factor B	SAFB	2.70845	down
201749_at	Endothelin converting enzyme 1	ECE1	10.2954	down
201750_s_at	endothelin converting enzyme 1	ECE1	1.43243	up
201751_at	Josephin domain containing 1	JOSD1	2.85819	down
201752_s_at	adducin 3 (gamma)	ADD3	2.04266	up
201753_s_at	adducin 3 (gamma)	ADD3	1.01228	down
201754_at	cytochrome c oxidase subunit VIc	COX6C	4.27716	down
201755_at	MCM5 minichromosome maintenance deficient 5, cell division cycle 46 (S. cerevisiae)	MCM5	1.50707	up
201756_at	replication protein A2, 32kDa	RPA2	3.73753	down
201757_at	NADH dehydrogenase (ubiquinone) Fe-S protein 5, 15kDa (NADH-coenzyme Q reductase)	NDUFS5	5.33481	down
201758_at	tumor susceptibility gene 101	TSG101	1.80696	down
201759_at	tubulin-specific chaperone d	TBCD	1.3495	down
201760_s_at	WD repeat and SOCS box-containing 2	WSB2	3.33812	down
201761_at	methylenetetrahydrofolate dehydrogenase (NADP+ dependent) 2, methenyltetrahydrofolate cyclohydrolase	MTHFD2	3.92198	down
201762_s_at	proteasome (prosome, macropain) activator subunit 2 (PA28 beta)	PSME2	2.88457	down
201763_s_at	death-associated protein 6	DAXX	2.85674	down
201764_at	transmembrane protein 106C	TMEM106C	1.50364	up
201765_s_at	hexosaminidase A (alpha polypeptide)	HEXA	6.86592	down
201766_at	elaC homolog 2 (E. coli)	ELAC2	1.31387	down
201767_s_at	elaC homolog 2 (E. coli)	ELAC2	8.04257	down
201768_s_at	enthoprotin	ENTH	1.21751	down
201769_at	enthoprotin	ENTH	7.79316	down
201770_at	small nuclear ribonucleoprotein polypeptide A	SNRPA	2.93709	down
201771_at	secretory carrier membrane protein 3	SCAMP3	10.5401	down
201772_at	antizyme inhibitor 1	AZIN1	1.72287	down
201773_at	activity-dependent neuroprotector	ADNP	7.43409	down
201774_s_at	chromosome condensation-related SMC-associated protein 1	CNAP1	2.275	down
201775_s_at	KIAA0494	KIAA0494	1.60662	up
201776_s_at	KIAA0494	KIAA0494	2.02309	down
201777_s_at	KIAA0494	KIAA0494	1.75788	down
201778_s_at	KIAA0494	KIAA0494	6.32983	down
201779_s_at	ring finger protein 13	RNF13	5.86258	down
201780_s_at	ring finger protein 13	RNF13	6.78524	down
201781_s_at	aryl hydrocarbon receptor interacting protein	AIP	1.9291	up
201782_s_at	aryl hydrocarbon receptor interacting protein	AIP	3.24481	down
201783_s_at	v-rel reticuloendotheliosis viral oncogene homolog A, nuclear factor of kappa light polypeptide gene enhancer in B-cells 3, p65 (avian)	RELA	5.38017	down
201784_s_at	chromosome 11 open reading frame 58	C11orf58	3.66464	down
201785_at	ribonuclease, RNase A family, 1 (pancreatic)	RNASE1	45.0325	down
201786_s_at	adenosine deaminase, RNA-specific	ADAR	4.18644	down
201787_at	fibulin 1	FBLN1	1.17069	down
201788_at	DEAD (Asp-Glu-Ala-Asp) box polypeptide 42	DDX42	2.16394	down
201789_at	dehydrogenase/reductase (SDR family) member 7	DHRS7	1.20456	up
201790_s_at	7-dehydrocholesterol reductase	DHCR7	1.09246	down
201791_s_at	7-dehydrocholesterol reductase	DHCR7	9.1289	down
201792_at	AE binding protein 1	AEBP1	1.05719	up
201793_x_at	Smg-7 homolog, nonsense mediated mRNA decay factor (C. elegans)	SMG7	1.37098	up
201794_s_at	Smg-7 homolog, nonsense mediated mRNA decay factor (C. elegans)	SMG7	1.32769	down
201795_at	lamin B receptor	LBR	4.81254	down
201796_s_at	valyl-tRNA synthetase	VARS	1.67395	up
201797_s_at	valyl-tRNA synthetase	VARS	2.25027	down
201798_s_at	fer-1-like 3, myoferlin (C. elegans)	FER1L3	23.2214	down
201799_s_at	oxysterol binding protein	OSBP	1.07762	down
201800_s_at	oxysterol binding protein	OSBP	5.16766	down
201801_s_at	solute carrier family 29 (nucleoside transporters), member 1	SLC29A1	3.73539	down
201802_at	solute carrier family 29 (nucleoside transporters), member 1	SLC29A1	1.2449	up
201803_at	polymerase (RNA) II (DNA directed) polypeptide B, 140kDa	POLR2B	13.2234	down
201804_x_at	cytoskeleton associated protein 1	CKAP1	6.34894	down
201805_at	protein kinase, AMP-activated, gamma 1 non-catalytic subunit	PRKAG1	4.2007	down
201806_s_at	ataxin 2-like	ATXN2L	1.20541	up
201807_at	vacuolar protein sorting 26 homolog A (yeast)	VPS26A	3.12745	down
201808_s_at	endoglin (Osler-Rendu-Weber syndrome 1)	ENG	1.14439	up
201809_s_at	endoglin (Osler-Rendu-Weber syndrome 1)	ENG	12.4219	down
201810_s_at	SH3-domain binding protein 5 (BTK-associated)	SH3BP5	6.56059	down
201811_x_at	SH3-domain binding protein 5 (BTK-associated)	SH3BP5	5.71964	down
201812_s_at	translocase of outer mitochondrial membrane 7 homolog (yeast) /// hypothetical protein LOC201725	TOMM7 /// LOC201725	5.14471	down
201813_s_at	TBC1 domain family, member 5	TBC1D5	4.1937	down
201814_at	TBC1 domain family, member 5	TBC1D5	3.63003	down
201815_s_at	TBC1 domain family, member 5	TBC1D5	1.03434	down
201816_s_at	glioblastoma amplified sequence	GBAS	5.96124	down
201817_at	ubiquitin protein ligase E3C	UBE3C	7.10352	down
201818_at	acyltransferase like 2	AYTL2	2.17378	down
201819_at	scavenger receptor class B, member 1	SCARB1	1.60758	up
201820_at	keratin 5 (epidermolysis bullosa simplex, Dowling-Meara/Kobner/Weber-Cockayne types)	KRT5	1.56895	down
201821_s_at	translocase of inner mitochondrial membrane 17 homolog A (yeast)	TIMM17A	2.04078	down
201822_at	translocase of inner mitochondrial membrane 17 homolog A (yeast)	TIMM17A	1.14088	up
201823_s_at	ring finger protein 14	RNF14	1.53098	up
201824_at	ring finger protein 14	RNF14	1.43135	up
201825_s_at	saccharopine dehydrogenase (putative)	SCCPDH	6.10644	down
201826_s_at	saccharopine dehydrogenase (putative)	SCCPDH	4.05593	down
201827_at	SWI/SNF related, matrix associated, actin dependent regulator of chromatin, subfamily d, member 2	SMARCD2	1.24605	up
201828_x_at	CAAX box 1	CXX1	12.9603	down
201829_at	neuroepithelial cell transforming gene 1	NET1	43.0968	down
201830_s_at	neuroepithelial cell transforming gene 1	NET1	20.8951	down
201831_s_at	vesicle docking protein p115	VDP	14.1853	down
201832_s_at	vesicle docking protein p115	VDP	12.7455	down
201833_at	histone deacetylase 2	HDAC2	6.63875	down
201834_at	protein kinase, AMP-activated, beta 1 non-catalytic subunit	PRKAB1	1.61264	down
201835_s_at	protein kinase, AMP-activated, beta 1 non-catalytic subunit	PRKAB1	1.88014	up
201836_s_at	suppressor of Ty 7 (S. cerevisiae)-like	SUPT7L	3.22471	down
201837_s_at	suppressor of Ty 7 (S. cerevisiae)-like	SUPT7L	5.23322	down
201838_s_at	suppressor of Ty 7 (S. cerevisiae)-like	SUPT7L	1.27387	up
201839_s_at	tumor-associated calcium signal transducer 1	TACSTD1	3.98049	up
201840_at	neural precursor cell expressed, developmentally down-regulated 8	NEDD8	2.2627	down
201841_s_at	heat shock 27kDa protein 1	HSPB1	8.61978	down
201842_s_at	EGF-containing fibulin-like extracellular matrix protein 1	EFEMP1	659.321	down
201843_s_at	EGF-containing fibulin-like extracellular matrix protein 1	EFEMP1	344.499	down
201844_s_at	RING1 and YY1 binding protein	RYBP	2.36339	down
201845_s_at	RING1 and YY1 binding protein	RYBP	2.63455	down
201846_s_at	RING1 and YY1 binding protein	RYBP	1.32522	down
201847_at	lipase A, lysosomal acid, cholesterol esterase (Wolman disease)	LIPA	3.32138	down
201848_s_at	BCL2/adenovirus E1B 19kDa interacting protein 3	BNIP3	7.3969	down
201849_at	BCL2/adenovirus E1B 19kDa interacting protein 3	BNIP3	19.654	down
201850_at	capping protein (actin filament), gelsolin-like	CAPG	1.47724	up
201851_at	SH3-domain GRB2-like 1	SH3GL1	1.20072	down
201852_x_at	collagen, type III, alpha 1 (Ehlers-Danlos syndrome type IV, autosomal dominant)	COL3A1	165.862	down
201853_s_at	cell division cycle 25B	CDC25B	1.33734	down
201854_s_at	ATM/ATR-Substrate Chk2-Interacting Zn2+-finger protein	ASCIZ	1.14587	down
201855_s_at	ATM/ATR-Substrate Chk2-Interacting Zn2+-finger protein	ASCIZ	5.35691	down
201856_s_at	zinc finger RNA binding protein	ZFR	1.76451	up
201857_at	zinc finger RNA binding protein	ZFR	5.09783	down
201858_s_at	proteoglycan 1, secretory granule	PRG1	2.25423	down
201859_at	proteoglycan 1, secretory granule	PRG1	1.63509	down
201860_s_at	plasminogen activator, tissue	PLAT	4.58897	down
201861_s_at	leucine rich repeat (in FLII) interacting protein 1	LRRFIP1	1.4067	down
201862_s_at	leucine rich repeat (in FLII) interacting protein 1	LRRFIP1	1.05677	down
201863_at	family with sequence similarity 32, member A	FAM32A	2.68462	down
201864_at	GDP dissociation inhibitor 1	GDI1	2.70881	down
201865_x_at	nuclear receptor subfamily 3, group C, member 1 (glucocorticoid receptor)	NR3C1	5.62289	down
201866_s_at	nuclear receptor subfamily 3, group C, member 1 (glucocorticoid receptor)	NR3C1	3.83535	down
201867_s_at	transducin (beta)-like 1X-linked	TBL1X	1.17546	up
201868_s_at	transducin (beta)-like 1X-linked	TBL1X	1.45109	down
201869_s_at	transducin (beta)-like 1X-linked	TBL1X	1.35656	up
201870_at	translocase of outer mitochondrial membrane 34	TOMM34	1.30981	down
201871_s_at	unknown protein LOC51035	LOC51035	3.33898	down
201872_s_at	ATP-binding cassette, sub-family E (OABP), member 1	ABCE1	3.61182	down
201873_s_at	ATP-binding cassette, sub-family E (OABP), member 1	ABCE1	5.58018	down
201874_at	myelin protein zero-like 1	MPZL1	4.93899	down
201875_s_at	myelin protein zero-like 1	MPZL1	5.82367	down
201876_at	paraoxonase 2	PON2	65.2507	down
201877_s_at	protein phosphatase 2, regulatory subunit B (B56), gamma isoform	PPP2R5C	4.79952	down
201878_at	ariadne homolog, ubiquitin-conjugating enzyme E2 binding protein, 1 (Drosophila)	ARIH1	1.20563	down
201879_at	ariadne homolog, ubiquitin-conjugating enzyme E2 binding protein, 1 (Drosophila)	ARIH1	1.06581	up
201880_at	Ariadne homolog, ubiquitin-conjugating enzyme E2 binding protein, 1 (Drosophila)	ARIH1	4.36395	down
201881_s_at	ariadne homolog, ubiquitin-conjugating enzyme E2 binding protein, 1 (Drosophila)	ARIH1	1.15623	up
201882_x_at	UDP-Gal:betaGlcNAc beta 1,4- galactosyltransferase, polypeptide 1	B4GALT1	1.55169	up
201883_s_at	UDP-Gal:betaGlcNAc beta 1,4- galactosyltransferase, polypeptide 1	B4GALT1	3.25541	down
201884_at	carcinoembryonic antigen-related cell adhesion molecule 5	CEACAM5	1.30062	up
201885_s_at	cytochrome b5 reductase 3	CYB5R3	1.89939	down
201886_at	WD repeat domain 23	WDR23	1.27085	up
201887_at	interleukin 13 receptor, alpha 1	IL13RA1	8.98184	down
201888_s_at	interleukin 13 receptor, alpha 1	IL13RA1	10.348	down
201889_at	family with sequence similarity 3, member C	FAM3C	22.2629	down
201890_at	ribonucleotide reductase M2 polypeptide	RRM2	1.77326	down
201891_s_at	beta-2-microglobulin	B2M	1.33458	up
201892_s_at	IMP (inosine monophosphate) dehydrogenase 2	IMPDH2	10.5917	down
201893_x_at	decorin	DCN	327.67	down
201894_s_at	signal sequence receptor, alpha (translocon-associated protein alpha)	SSR1	2.70992	down
201895_at	v-raf murine sarcoma 3611 viral oncogene homolog	ARAF	1.01474	up
201896_s_at	proline/serine-rich coiled-coil 1	PSRC1	1.91634	up
201897_s_at	CDC28 protein kinase regulatory subunit 1B	CKS1B	5.36943	down
201898_s_at	ubiquitin-conjugating enzyme E2A (RAD6 homolog)	UBE2A	2.27192	down
201899_s_at	ubiquitin-conjugating enzyme E2A (RAD6 homolog)	UBE2A	6.78948	down
201900_s_at	aldo-keto reductase family 1, member A1 (aldehyde reductase)	AKR1A1	8.62211	down
201901_s_at	YY1 transcription factor	YY1	1.87478	down
201902_s_at	YY1 transcription factor	YY1	1.01979	down
201903_at	ubiquinol-cytochrome c reductase core protein I	UQCRC1	2.16547	down
201904_s_at	CTD (carboxy-terminal domain, RNA polymerase II, polypeptide A) small phosphatase-like	CTDSPL	2.20324	up
201905_s_at	CTD (carboxy-terminal domain, RNA polymerase II, polypeptide A) small phosphatase-like	CTDSPL	1.40697	down
201906_s_at	CTD (carboxy-terminal domain, RNA polymerase II, polypeptide A) small phosphatase-like	CTDSPL	1.52321	up
201907_x_at	dishevelled, dsh homolog 3 (Drosophila)	DVL3	1.01975	down
201908_at	dishevelled, dsh homolog 3 (Drosophila)	DVL3	6.65482	down
201909_at	ribosomal protein S4, Y-linked 1	RPS4Y1	135.364	down
201910_at	FERM, RhoGEF (ARHGEF) and pleckstrin domain protein 1 (chondrocyte-derived)	FARP1	1.49108	down
201911_s_at	FERM, RhoGEF (ARHGEF) and pleckstrin domain protein 1 (chondrocyte-derived)	FARP1	16.8395	down
201912_s_at	G1 to S phase transition 1 /// G1 to S phase transition 1	GSPT1	1.99679	up
201913_s_at	Coenzyme A synthase	COASY	1.32366	down
201914_s_at	SEC63-like (S. cerevisiae)	SEC63	4.2234	down
201915_at	SEC63-like (S. cerevisiae)	SEC63	1.84622	down
201916_s_at	SEC63-like (S. cerevisiae)	SEC63	6.72672	down
201917_s_at	solute carrier family 25, member 36	SLC25A36	3.21407	down
201918_at	Solute carrier family 25, member 36	SLC25A36	1.17992	up
201919_at	Solute carrier family 25, member 36	SLC25A36	6.06814	down
201920_at	solute carrier family 20 (phosphate transporter), member 1	SLC20A1	7.86056	down
201921_at	guanine nucleotide binding protein (G protein), gamma 10 /// hypothetical protein LOC552891 /// similar to Guanine nucleotide-binding protein G(I)/G(S)/G(O) gamma-10 subunit	GNG10 /// LOC552891 /// LOC653503	5.25977	down
201922_at	TGF beta-inducible nuclear protein 1	TINP1	5.57614	down
201923_at	peroxiredoxin 4	PRDX4	17.5958	down
201924_at	AF4/FMR2 family, member 1	AFF1	4.72483	down
201925_s_at	CD55 molecule, decay accelerating factor for complement (Cromer blood group)	CD55	2.93726	down
201926_s_at	CD55 molecule, decay accelerating factor for complement (Cromer blood group)	CD55	1.05212	down
201927_s_at	plakophilin 4	PKP4	6.96154	down
201928_at	plakophilin 4	PKP4	3.93614	down
201929_s_at	plakophilin 4	PKP4	2.07876	down
201930_at	MCM6 minichromosome maintenance deficient 6 (MIS5 homolog, S. pombe) (S. cerevisiae)	MCM6	2.30129	down
201931_at	electron-transfer-flavoprotein, alpha polypeptide (glutaric aciduria II)	ETFA	1.43032	up
201932_at	leucine rich repeat containing 41	LRRC41	10.7795	down
201933_at	procollagen (type III) N-endopeptidase	PCOLN3	1.3952	down
201934_at	Transmembrane protein 113	TMEM113	5.1303	down
201935_s_at	eukaryotic translation initiation factor 4 gamma, 3	EIF4G3	1.56733	down
201936_s_at	eukaryotic translation initiation factor 4 gamma, 3	EIF4G3	1.45988	down
201937_s_at	aspartyl aminopeptidase	DNPEP	3.86228	down
201938_at	CDK2-associated protein 1	CDK2AP1	1.71485	down
201939_at	polo-like kinase 2 (Drosophila)	PLK2	52.2401	down
201940_at	carboxypeptidase D	CPD	5.13934	down
201941_at	carboxypeptidase D	CPD	11.222	down
201942_s_at	carboxypeptidase D	CPD	1.44562	down
201943_s_at	carboxypeptidase D	CPD	7.42054	down
201944_at	hexosaminidase B (beta polypeptide)	HEXB	7.67175	down
201945_at	furin (paired basic amino acid cleaving enzyme)	FURIN	1.45545	up
201946_s_at	chaperonin containing TCP1, subunit 2 (beta)	CCT2	3.95038	down
201947_s_at	chaperonin containing TCP1, subunit 2 (beta)	CCT2	6.15846	down
201948_at	guanine nucleotide binding protein-like 2 (nucleolar)	GNL2	3.33311	down
201949_x_at	capping protein (actin filament) muscle Z-line, beta	CAPZB	1.60154	down
201950_x_at	capping protein (actin filament) muscle Z-line, beta	CAPZB	1.73138	down
201951_at	activated leukocyte cell adhesion molecule	ALCAM	22.6165	down
201952_at	activated leukocyte cell adhesion molecule	ALCAM	22.6667	down
201953_at	calcium and integrin binding 1 (calmyrin)	CIB1	2.04816	down
201954_at	actin related protein 2/3 complex, subunit 1B, 41kDa /// similar to Actin-related protein 2/3 complex subunit 1B (ARP2/3 complex 41 kDa subunit) (p41-ARC)	ARPC1B /// LOC653888	1.06973	down
201955_at	cyclin C	CCNC	4.44353	down
201956_s_at	glyceronephosphate O-acyltransferase	GNPAT	7.89952	down
201957_at	protein phosphatase 1, regulatory (inhibitor) subunit 12B	PPP1R12B	1.23715	up
201958_s_at	protein phosphatase 1, regulatory (inhibitor) subunit 12B	PPP1R12B	4.56115	down
201959_s_at	MYC binding protein 2	MYCBP2	3.19927	down
201960_s_at	MYC binding protein 2	MYCBP2	4.01477	down
201961_s_at	ring finger protein 41	RNF41	2.74095	down
201962_s_at	ring finger protein 41	RNF41	4.77272	down
201963_at	acyl-CoA synthetase long-chain family member 1	ACSL1	1.86509	down
201964_at	senataxin	SETX	3.31847	down
201965_s_at	senataxin	SETX	2.18771	down
201966_at	NADH dehydrogenase (ubiquinone) Fe-S protein 2, 49kDa (NADH-coenzyme Q reductase)	NDUFS2	4.02957	down
201967_at	RNA binding motif protein 6	RBM6	3.22622	down
201968_s_at	phosphoglucomutase 1	PGM1	3.24608	down
201969_at	nuclear autoantigenic sperm protein (histone-binding)	NASP	1.1815	up
201970_s_at	nuclear autoantigenic sperm protein (histone-binding)	NASP	10.4154	down
201971_s_at	ATPase, H+ transporting, lysosomal 70kDa, V1 subunit A	ATP6V1A	1.07706	up
201972_at	ATPase, H+ transporting, lysosomal 70kDa, V1 subunit A	ATP6V1A	3.65783	down
201973_s_at	chromosome 7 open reading frame 28A	C7orf28A	5.00892	down
201974_s_at	chromosome 7 open reading frame 28A /// chromosome 7 open reading frame 28B /// similar to CG14980-PB /// similar to CG14980-PB	C7orf28A /// C7orf28B /// LOC647357 /// LOC652200	1.02209	down
201975_at	restin (Reed-Steinberg cell-expressed intermediate filament-associated protein)	RSN	3.13156	down
201976_s_at	myosin X	MYO10	50.1654	down
201977_s_at	KIAA0141	KIAA0141	1.61853	up
201978_s_at	KIAA0141	KIAA0141	13.3929	down
201979_s_at	protein phosphatase 5, catalytic subunit	PPP5C	1.1015	up
201980_s_at	Ras suppressor protein 1	RSU1	1.23645	down
201981_at	pregnancy-associated plasma protein A, pappalysin 1	PAPPA	1.52996	down
201982_s_at	pregnancy-associated plasma protein A, pappalysin 1	PAPPA	1.1302	down
201983_s_at	epidermal growth factor receptor (erythroblastic leukemia viral (v-erb-b) oncogene homolog, avian)	EGFR	2.62158	down
201984_s_at	epidermal growth factor receptor (erythroblastic leukemia viral (v-erb-b) oncogene homolog, avian)	EGFR	1.76501	down
201985_at	KIAA0196	KIAA0196	2.23866	down
201986_at	thyroid hormone receptor associated protein 1	THRAP1	7.33244	down
201987_at	thyroid hormone receptor associated protein 1	THRAP1	9.60212	down
201988_s_at	cAMP responsive element binding protein-like 2	CREBL2	1.5935	up
201989_s_at	cAMP responsive element binding protein-like 2	CREBL2	1.06648	up
201990_s_at	cAMP responsive element binding protein-like 2	CREBL2	2.26325	down
201991_s_at	kinesin family member 5B	KIF5B	4.80419	down
201992_s_at	kinesin family member 5B	KIF5B	1.75105	down
201993_x_at	heterogeneous nuclear ribonucleoprotein D-like	HNRPDL	4.24422	down
201994_at	mortality factor 4 like 2	MORF4L2	30.0875	down
201995_at	exostoses (multiple) 1	EXT1	2.09349	down
201996_s_at	spen homolog, transcriptional regulator (Drosophila)	SPEN	1.27484	down
201997_s_at	spen homolog, transcriptional regulator (Drosophila)	SPEN	2.03549	down
201998_at	ST6 beta-galactosamide alpha-2,6-sialyltranferase 1	ST6GAL1	10.3084	down
201999_s_at	dynein, light chain, Tctex-type 1	DYNLT1	3.49704	down
202000_at	NADH dehydrogenase (ubiquinone) 1 alpha subcomplex, 6, 14kDa	NDUFA6	1.41129	down
202001_s_at	NADH dehydrogenase (ubiquinone) 1 alpha subcomplex, 6, 14kDa	NDUFA6	1.26752	down
202002_at	acetyl-Coenzyme A acyltransferase 2 (mitochondrial 3-oxoacyl-Coenzyme A thiolase)	ACAA2	1.53883	up
202003_s_at	acetyl-Coenzyme A acyltransferase 2 (mitochondrial 3-oxoacyl-Coenzyme A thiolase)	ACAA2	3.96533	down
202004_x_at	succinate dehydrogenase complex, subunit C, integral membrane protein, 15kDa /// similar to succinate dehydrogenase complex, subunit C isoform 3 precursor	SDHC /// LOC642502	2.04415	down
202005_at	suppression of tumorigenicity 14 (colon carcinoma)	ST14	1.08915	up
202006_at	protein tyrosine phosphatase, non-receptor type 12	PTPN12	1.07744	down
202007_at	nidogen 1	NID1	62.3791	down
202008_s_at	nidogen 1	NID1	1.28536	down
202009_at	PTK9L protein tyrosine kinase 9-like (A6-related protein)	PTK9L	1.70013	down
202010_s_at	zinc finger protein 410	ZNF410	1.8198	down
202011_at	tight junction protein 1 (zona occludens 1)	TJP1	74.5666	down
202012_s_at	exostoses (multiple) 2	EXT2	8.50366	down
202013_s_at	exostoses (multiple) 2	EXT2	3.85679	down
202014_at	protein phosphatase 1, regulatory (inhibitor) subunit 15A	PPP1R15A	5.40515	down
202015_x_at	methionyl aminopeptidase 2	METAP2	1.28168	down
202016_at	mesoderm specific transcript homolog (mouse)	MEST	16.0875	down
202017_at	epoxide hydrolase 1, microsomal (xenobiotic)	EPHX1	1.1203	down
202018_s_at	lactotransferrin /// similar to lactotransferrin	LTF /// LOC643349	1.30654	up
202019_s_at	LanC lantibiotic synthetase component C-like 1 (bacterial)	LANCL1	1.83152	down
202020_s_at	LanC lantibiotic synthetase component C-like 1 (bacterial)	LANCL1	13.7277	down
202021_x_at	eukaryotic translation initiation factor 1	EIF1	2.6024	down
202022_at	aldolase C, fructose-bisphosphate	ALDOC	2.77816	down
202023_at	ephrin-A1	EFNA1	127.499	down
202024_at	arsA arsenite transporter, ATP-binding, homolog 1 (bacterial)	ASNA1	1.5998	down
202025_x_at	acetyl-Coenzyme A acyltransferase 1 (peroxisomal 3-oxoacyl-Coenzyme A thiolase)	ACAA1	4.31749	down
202026_at	succinate dehydrogenase complex, subunit D, integral membrane protein	SDHD	5.44058	down
202027_at	chromosome 22 open reading frame 5	C22orf5	18.9007	down
202028_s_at	ribosomal protein L38	RPL38	2.16584	down
202029_x_at	ribosomal protein L38	RPL38	2.25361	down
202030_at	branched chain ketoacid dehydrogenase kinase	BCKDK	1.25007	down
202031_s_at	WD repeat domain, phosphoinositide interacting 2	WIPI2	1.05525	up
202032_s_at	mannosidase, alpha, class 2A, member 2	MAN2A2	1.11267	up
202033_s_at	RB1-inducible coiled-coil 1	RB1CC1	2.95224	down
202034_x_at	RB1-inducible coiled-coil 1	RB1CC1	2.77294	down
202035_s_at	secreted frizzled-related protein 1	SFRP1	1.09142	down
202036_s_at	secreted frizzled-related protein 1	SFRP1	1.81825	down
202037_s_at	secreted frizzled-related protein 1	SFRP1	1.43659	down
202038_at	ubiquitination factor E4A (UFD2 homolog, yeast)	UBE4A	9.12512	down
202039_at	TGFB1-induced anti-apoptotic factor 1 /// myosin XVIIIA	TIAF1 /// MYO18A	1.62128	down
202040_s_at	Jumonji, AT rich interactive domain 1A (RBBP2-like)	JARID1A	2.19485	down
202041_s_at	fibroblast growth factor (acidic) intracellular binding protein	FIBP	2.24347	down
202042_at	histidyl-tRNA synthetase	HARS	6.99388	down
202043_s_at	spermine synthase	SMS	1.34377	down
202044_at	glucocorticoid receptor DNA binding factor 1	GRLF1	1.36393	down
202045_s_at	glucocorticoid receptor DNA binding factor 1	GRLF1	1.51163	up
202046_s_at	glucocorticoid receptor DNA binding factor 1	GRLF1	1.60427	down
202047_s_at	chromobox homolog 6	CBX6	4.04199	down
202048_s_at	chromobox homolog 6	CBX6	5.28229	down
202049_s_at	zinc finger, MYM-type 4	ZMYM4	9.96695	down
202050_s_at	zinc finger, MYM-type 4	ZMYM4	4.63972	down
202051_s_at	zinc finger, MYM-type 4	ZMYM4	20.7256	down
202052_s_at	retinoic acid induced 14	RAI14	411.905	down
202053_s_at	aldehyde dehydrogenase 3 family, member A2	ALDH3A2	1.37377	down
202054_s_at	aldehyde dehydrogenase 3 family, member A2	ALDH3A2	8.41661	down
202055_at	karyopherin alpha 1 (importin alpha 5)	KPNA1	3.08263	down
202056_at	karyopherin alpha 1 (importin alpha 5)	KPNA1	2.09374	down
202057_at	karyopherin alpha 1 (importin alpha 5)	KPNA1	1.40871	down
202058_s_at	karyopherin alpha 1 (importin alpha 5)	KPNA1	1.26135	down
202059_s_at	karyopherin alpha 1 (importin alpha 5)	KPNA1	1.4719	down
202060_at	Ctr9, Paf1/RNA polymerase II complex component, homolog (S. cerevisiae)	CTR9	4.66807	down
202061_s_at	sel-1 suppressor of lin-12-like (C. elegans)	SEL1L	7.83159	down
202062_s_at	sel-1 suppressor of lin-12-like (C. elegans)	SEL1L	1.60448	down
202063_s_at	sel-1 suppressor of lin-12-like (C. elegans)	SEL1L	1.2114	down
202064_s_at	sel-1 suppressor of lin-12-like (C. elegans)	SEL1L	1.66524	up
202065_s_at	protein tyrosine phosphatase, receptor type, f polypeptide (PTPRF), interacting protein (liprin), alpha 1	PPFIA1	1.00692	down
202066_at	protein tyrosine phosphatase, receptor type, f polypeptide (PTPRF), interacting protein (liprin), alpha 1	PPFIA1	8.66517	down
202067_s_at	low density lipoprotein receptor (familial hypercholesterolemia)	LDLR	1.27964	down
202068_s_at	low density lipoprotein receptor (familial hypercholesterolemia)	LDLR	1.84625	down
202069_s_at	isocitrate dehydrogenase 3 (NAD+) alpha	IDH3A	2.40365	down
202070_s_at	isocitrate dehydrogenase 3 (NAD+) alpha	IDH3A	1.08816	up
202071_at	syndecan 4 (amphiglycan, ryudocan)	SDC4	1.22224	up
202072_at	heterogeneous nuclear ribonucleoprotein L	HNRPL	2.59881	down
202073_at	optineurin	OPTN	2.25926	up
202074_s_at	optineurin	OPTN	2.17935	up
202075_s_at	phospholipid transfer protein	PLTP	3.81698	down
202076_at	baculoviral IAP repeat-containing 2	BIRC2	1.00731	down
202077_at	NADH dehydrogenase (ubiquinone) 1, alpha/beta subcomplex, 1, 8kDa	NDUFAB1	9.94722	down
202078_at	COP9 constitutive photomorphogenic homolog subunit 3 (Arabidopsis)	COPS3	1.36883	down
202079_s_at	trafficking protein, kinesin binding 1	TRAK1	1.09381	down
202080_s_at	trafficking protein, kinesin binding 1	TRAK1	41.7764	down
202081_at	immediate early response 2	IER2	14.1942	down
202082_s_at	SEC14-like 1 (S. cerevisiae)	SEC14L1	3.2273	up
202083_s_at	SEC14-like 1 (S. cerevisiae)	SEC14L1	2.67914	up
202084_s_at	SEC14-like 1 (S. cerevisiae)	SEC14L1	1.90639	up
202085_at	tight junction protein 2 (zona occludens 2)	TJP2	5.50204	down
202086_at	myxovirus (influenza virus) resistance 1, interferon-inducible protein p78 (mouse) /// myxovirus (influenza virus) resistance 1, interferon-inducible protein p78 (mouse)	MX1	7.42303	down
202087_s_at	cathepsin L	CTSL	26.8816	down
202088_at	solute carrier family 39 (zinc transporter), member 6	SLC39A6	2.83637	down
202089_s_at	solute carrier family 39 (zinc transporter), member 6	SLC39A6	1.22412	up
202090_s_at	ubiquinol-cytochrome c reductase, 6.4kDa subunit	UQCR	1.0751	down
202091_at	ADP-ribosylation factor-like 2 binding protein	ARL2BP	2.02894	down
202092_s_at	ADP-ribosylation factor-like 2 binding protein	ARL2BP	4.0032	down
202093_s_at	Paf1, RNA polymerase II associated factor, homolog (S. cerevisiae)	PAF1	3.64782	down
202094_at	baculoviral IAP repeat-containing 5 (survivin)	BIRC5	1.21663	down
202095_s_at	baculoviral IAP repeat-containing 5 (survivin)	BIRC5	2.0415	up
202096_s_at	benzodiazapine receptor (peripheral)	BZRP	2.12141	down
202097_at	nucleoporin 153kDa	NUP153	3.2088	down
202098_s_at	protein arginine methyltransferase 2	PRMT2	2.96795	down
202099_s_at	DiGeorge syndrome critical region gene 2	DGCR2	1.21697	down
202100_at	v-ral simian leukemia viral oncogene homolog B (ras related; GTP binding protein)	RALB	4.10748	down
202101_s_at	v-ral simian leukemia viral oncogene homolog B (ras related; GTP binding protein)	RALB	1.52389	down
202102_s_at	bromodomain containing 4	BRD4	1.49895	up
202103_at	bromodomain containing 4	BRD4	1.55651	up
202104_s_at	spastic paraplegia 7, paraplegin (pure and complicated autosomal recessive)	SPG7	3.73089	down
202105_at	immunoglobulin (CD79A) binding protein 1	IGBP1	5.27004	down
202106_at	golgi autoantigen, golgin subfamily a, 3	GOLGA3	2.06406	down
202107_s_at	MCM2 minichromosome maintenance deficient 2, mitotin (S. cerevisiae)	MCM2	1.23682	down
202108_at	peptidase D	PEPD	3.52451	down
202109_at	ADP-ribosylation factor interacting protein 2 (arfaptin 2)	ARFIP2	1.93646	down
202110_at	cytochrome c oxidase subunit VIIb	COX7B	2.59172	down
202111_at	solute carrier family 4, anion exchanger, member 2 (erythrocyte membrane protein band 3-like 1)	SLC4A2	3.29671	down
202112_at	von Willebrand factor	VWF	289.872	down
202113_s_at	sorting nexin 2	SNX2	1.44306	down
202114_at	sorting nexin 2	SNX2	1.84582	down
202115_s_at	nucleolar complex associated 2 homolog (S. cerevisiae)	NOC2L	1.6014	down
202116_at	D4, zinc and double PHD fingers family 2	DPF2	22.6341	down
202117_at	Rho GTPase activating protein 1	ARHGAP1	4.23591	down
202118_s_at	copine III	CPNE3	1.64613	down
202119_s_at	copine III	CPNE3	8.36114	down
202120_x_at	adaptor-related protein complex 2, sigma 1 subunit	AP2S1	1.40255	down
202121_s_at	chromatin modifying protein 2A	CHMP2A	2.30641	down
202122_s_at	mannose-6-phosphate receptor binding protein 1	M6PRBP1	2.64072	down
202123_s_at	v-abl Abelson murine leukemia viral oncogene homolog 1	ABL1	14.2464	down
202124_s_at	trafficking protein, kinesin binding 2	TRAK2	3.01647	up
202125_s_at	trafficking protein, kinesin binding 2	TRAK2	1.52031	up
202126_at	PRP4 pre-mRNA processing factor 4 homolog B (yeast)	PRPF4B	5.11212	down
202127_at	PRP4 pre-mRNA processing factor 4 homolog B (yeast)	PRPF4B	3.59435	down
202128_at	KIAA0317	KIAA0317	3.1338	down
202129_s_at	RIO kinase 3 (yeast) /// RIO kinase 3 (yeast)	RIOK3	3.39241	up
202130_at	RIO kinase 3 (yeast) /// RIO kinase 3 (yeast)	RIOK3	1.48418	up
202131_s_at	RIO kinase 3 (yeast) /// RIO kinase 3 (yeast)	RIOK3	3.16045	up
202132_at	WW domain containing transcription regulator 1	WWTR1	25.4753	down
202133_at	WW domain containing transcription regulator 1	WWTR1	361.775	down
202134_s_at	WW domain containing transcription regulator 1	WWTR1	3.76659	down
202135_s_at	ARP1 actin-related protein 1 homolog B, centractin beta (yeast)	ACTR1B	3.25967	down
202136_at	zinc finger, MYND domain containing 11	ZMYND11	9.40568	down
202137_s_at	zinc finger, MYND domain containing 11	ZMYND11	1.25957	up
202138_x_at	JTV1 gene	JTV1	6.97129	down
202139_at	aldo-keto reductase family 7, member A2 (aflatoxin aldehyde reductase)	AKR7A2	4.06373	down
202140_s_at	CDC-like kinase 3	CLK3	1.76175	up
202141_s_at	COP9 constitutive photomorphogenic homolog subunit 8 (Arabidopsis)	COPS8	11.3725	down
202142_at	COP9 constitutive photomorphogenic homolog subunit 8 (Arabidopsis)	COPS8	8.10321	down
202143_s_at	COP9 constitutive photomorphogenic homolog subunit 8 (Arabidopsis)	COPS8	3.42316	down
202144_s_at	adenylosuccinate lyase	ADSL	6.1391	down
202145_at	lymphocyte antigen 6 complex, locus E	LY6E	1.35841	down
202146_at	interferon-related developmental regulator 1	IFRD1	3.60378	down
202147_s_at	interferon-related developmental regulator 1	IFRD1	3.0689	down
202148_s_at	pyrroline-5-carboxylate reductase 1	PYCR1	1.48645	up
202149_at	neural precursor cell expressed, developmentally down-regulated 9	NEDD9	5.83729	down
202150_s_at	neural precursor cell expressed, developmentally down-regulated 9	NEDD9	1.03137	down
202151_s_at	ubiquitin associated domain containing 1	UBADC1	1.01094	up
202152_x_at	upstream transcription factor 2, c-fos interacting	USF2	1.71108	up
202153_s_at	nucleoporin 62kDa	NUP62	6.08965	down
202154_x_at	tubulin, beta 3	TUBB3	1.36893	down
202155_s_at	nucleoporin 214kDa	NUP214	1.57076	down
202156_s_at	CUG triplet repeat, RNA binding protein 2	CUGBP2	1.45893	up
202157_s_at	CUG triplet repeat, RNA binding protein 2	CUGBP2	1.05452	down
202158_s_at	CUG triplet repeat, RNA binding protein 2	CUGBP2	2.12477	down
202159_at	phenylalanine-tRNA synthetase-like, alpha subunit	FARSLA	1.06828	up
202160_at	CREB binding protein (Rubinstein-Taybi syndrome)	CREBBP	1.90329	down
202161_at	protein kinase N1	PKN1	1.79884	down
202162_s_at	CCR4-NOT transcription complex, subunit 8	CNOT8	1.26686	down
202163_s_at	CCR4-NOT transcription complex, subunit 8	CNOT8	2.89817	down
202164_s_at	CCR4-NOT transcription complex, subunit 8	CNOT8	3.83893	down
202165_at	protein phosphatase 1, regulatory (inhibitor) subunit 2	PPP1R2	2.55066	down
202166_s_at	protein phosphatase 1, regulatory (inhibitor) subunit 2	PPP1R2	3.87125	down
202167_s_at	MMS19-like (MET18 homolog, S. cerevisiae)	MMS19L	2.06853	down
202168_at	TAF9 RNA polymerase II, TATA box binding protein (TBP)-associated factor, 32kDa	TAF9	2.63444	down
202169_s_at	aminoadipate-semialdehyde dehydrogenase-phosphopantetheinyl transferase	AASDHPPT	10.2886	down
202170_s_at	aminoadipate-semialdehyde dehydrogenase-phosphopantetheinyl transferase	AASDHPPT	3.87975	down
202171_at	zinc finger protein 161	ZNF161	3.31215	down
202172_at	zinc finger protein 161	ZNF161	9.88275	down
202173_s_at	zinc finger protein 161	ZNF161	4.61203	down
202174_s_at	pericentriolar material 1	PCM1	2.61934	down
202175_at	chondroitin polymerizing factor	CHPF	1.12098	down
202176_at	excision repair cross-complementing rodent repair deficiency, complementation group 3 (xeroderma pigmentosum group B complementing)	ERCC3	1.16251	up
202177_at	growth arrest-specific 6	GAS6	169.948	down
202178_at	protein kinase C, zeta	PRKCZ	5.91191	down
202179_at	bleomycin hydrolase	BLMH	7.1418	down
202180_s_at	major vault protein	MVP	4.40505	down
202181_at	KIAA0247	KIAA0247	4.69424	down
202182_at	GCN5 general control of amino-acid synthesis 5-like 2 (yeast)	GCN5L2	5.74174	down
202183_s_at	kinesin family member 22	KIF22	1.03745	up
202184_s_at	nucleoporin 133kDa	NUP133	31.1826	down
202185_at	procollagen-lysine, 2-oxoglutarate 5-dioxygenase 3	PLOD3	10.7144	down
202186_x_at	protein phosphatase 2, regulatory subunit B (B56), alpha isoform	PPP2R5A	1.02401	down
202187_s_at	protein phosphatase 2, regulatory subunit B (B56), alpha isoform	PPP2R5A	3.24352	down
202188_at	nucleoporin 93kDa	NUP93	5.01793	down
202189_x_at	polypyrimidine tract binding protein 1	PTBP1	2.5798	down
202190_at	cleavage stimulation factor, 3' pre-RNA, subunit 1, 50kDa	CSTF1	1.88281	down
202191_s_at	growth arrest-specific 7	GAS7	1.38599	up
202192_s_at	growth arrest-specific 7	GAS7	1.21614	up
202193_at	LIM domain kinase 2	LIMK2	3.34442	down
202194_at	transmembrane emp24 protein transport domain containing 5	TMED5	3.24622	down
202195_s_at	transmembrane emp24 protein transport domain containing 5	TMED5	1.31669	down
202196_s_at	dickkopf homolog 3 (Xenopus laevis)	DKK3	43.2278	down
202197_at	myotubularin related protein 3	MTMR3	1.17619	down
202198_s_at	myotubularin related protein 3	MTMR3	1.22907	up
202199_s_at	SFRS protein kinase 1	SRPK1	1.11635	up
202200_s_at	SFRS protein kinase 1	SRPK1	10.8118	down
202201_at	biliverdin reductase B (flavin reductase (NADPH))	BLVRB	1.31678	up
202202_s_at	laminin, alpha 4	LAMA4	285.704	down
202203_s_at	autocrine motility factor receptor	AMFR	1.26957	up
202204_s_at	autocrine motility factor receptor	AMFR	1.27986	up
202205_at	vasodilator-stimulated phosphoprotein	VASP	1.1741	down
202206_at	ADP-ribosylation factor-like 4C	ARL4C	1.1314	up
202207_at	ADP-ribosylation factor-like 4C	ARL4C	1.30692	down
202208_s_at	ADP-ribosylation factor-like 4C	ARL4C	1.06529	up
202209_at	LSM3 homolog, U6 small nuclear RNA associated (S. cerevisiae)	LSM3	1.19749	down
202210_x_at	glycogen synthase kinase 3 alpha	GSK3A	1.01462	down
202211_at	ADP-ribosylation factor GTPase activating protein 3	ARFGAP3	6.86936	down
202212_at	pescadillo homolog 1, containing BRCT domain (zebrafish)	PES1	1.43347	up
202213_s_at	cullin 4B	CUL4B	2.61274	up
202214_s_at	cullin 4B	CUL4B	10.2704	down
202215_s_at	nuclear transcription factor Y, gamma	NFYC	1.8923	down
202216_x_at	nuclear transcription factor Y, gamma	NFYC	1.71464	down
202217_at	chromosome 21 open reading frame 33	C21orf33	6.06875	down
202218_s_at	fatty acid desaturase 2	FADS2	1.22979	up
202219_at	solute carrier family 6 (neurotransmitter transporter, creatine), member 8	SLC6A8	1.47465	up
202220_at	KIAA0907	KIAA0907	4.06629	down
202221_s_at	E1A binding protein p300	EP300	3.01761	down
202222_s_at	desmin	DES	1.30939	up
202223_at	STT3, subunit of the oligosaccharyltransferase complex, homolog A (S. cerevisiae)	STT3A	2.53125	down
202224_at	v-crk sarcoma virus CT10 oncogene homolog (avian)	CRK	17.5066	down
202225_at	CDNA FLJ38130 fis, clone D6OST2000464		35.2212	down
202226_s_at	v-crk sarcoma virus CT10 oncogene homolog (avian)	CRK	1.19753	down
202227_s_at	bromodomain containing 8	BRD8	6.55387	down
202228_s_at	neuroplastin	NPTN	2.47408	down
202229_s_at	calcium homeostasis endoplasmic reticulum protein	CHERP	1.4768	up
202230_s_at	calcium homeostasis endoplasmic reticulum protein	CHERP	17.0641	down
202231_at	PCI domain containing 1 (herpesvirus entry mediator)	PCID1	5.03587	down
202232_s_at	PCI domain containing 1 (herpesvirus entry mediator)	PCID1	3.56817	down
202233_s_at	ubiquinol-cytochrome c reductase hinge protein	UQCRH	2.07791	down
202234_s_at	solute carrier family 16 (monocarboxylic acid transporters), member 1	SLC16A1	1.97058	down
202235_at	solute carrier family 16 (monocarboxylic acid transporters), member 1	SLC16A1	2.59838	down
202236_s_at	solute carrier family 16 (monocarboxylic acid transporters), member 1	SLC16A1	3.58942	down
202237_at	nicotinamide N-methyltransferase	NNMT	258.682	down
202238_s_at	nicotinamide N-methyltransferase	NNMT	81.3616	down
202239_at	poly (ADP-ribose) polymerase family, member 4	PARP4	3.13623	down
202240_at	polo-like kinase 1 (Drosophila)	PLK1	1.02902	up
202241_at	tribbles homolog 1 (Drosophila)	TRIB1	14.3404	down
202242_at	tetraspanin 7	TSPAN7	19.2333	down
202243_s_at	proteasome (prosome, macropain) subunit, beta type, 4	PSMB4	9.16412	down
202244_at	proteasome (prosome, macropain) subunit, beta type, 4	PSMB4	6.31204	down
202245_at	lanosterol synthase (2,3-oxidosqualene-lanosterol cyclase)	LSS	1.50937	up
202246_s_at	cyclin-dependent kinase 4	CDK4	19.4063	down
202247_s_at	metastasis associated 1	MTA1	1.35352	down
202248_at	E2F transcription factor 4, p107/p130-binding	E2F4	1.15774	up
202249_s_at	WD repeat domain 42A	WDR42A	1.02532	down
202250_s_at	WD repeat domain 42A	WDR42A	1.5469	up
202251_at	PRP3 pre-mRNA processing factor 3 homolog (S. cerevisiae)	PRPF3	4.84342	down
202252_at	RAB13, member RAS oncogene family	RAB13	13.7362	down
202253_s_at	dynamin 2	DNM2	2.11577	down
202254_at	Signal-induced proliferation-associated 1 like 1	SIPA1L1	1.94175	up
202255_s_at	signal-induced proliferation-associated 1 like 1	SIPA1L1	1.63603	down
202256_at	CD2 (cytoplasmic tail) binding protein 2	CD2BP2	1.92405	down
202257_s_at	CD2 (cytoplasmic tail) binding protein 2	CD2BP2	5.1354	down
202258_s_at	phosphonoformate immuno-associated protein 5	PFAAP5	8.67291	down
202259_s_at	phosphonoformate immuno-associated protein 5	PFAAP5	1.44791	down
202260_s_at	syntaxin binding protein 1	STXBP1	52.3141	down
202261_at	vacuolar protein sorting 72 (S. cerevisiae)	VPS72	3.96839	down
202262_x_at	dimethylarginine dimethylaminohydrolase 2	DDAH2	1.42176	up
202263_at	cytochrome b5 reductase 1	CYB5R1	1.00469	down
202264_s_at	translocase of outer mitochondrial membrane 40 homolog (yeast)	TOMM40	1.1643	up
202265_at	B lymphoma Mo-MLV insertion region (mouse)	BMI1	6.38391	down
202266_at	TRAF and TNF receptor associated protein	TTRAP	5.00851	down
202267_at	laminin, gamma 2	LAMC2	1.47065	up
202268_s_at	amyloid beta precursor protein binding protein 1	APPBP1	3.20603	down
202269_x_at	guanylate binding protein 1, interferon-inducible, 67kDa /// guanylate binding protein 1, interferon-inducible, 67kDa	GBP1	2.35469	down
202270_at	guanylate binding protein 1, interferon-inducible, 67kDa /// guanylate binding protein 1, interferon-inducible, 67kDa	GBP1	7.90091	down
202271_at	F-box protein 28	FBXO28	3.1731	down
202272_s_at	F-box protein 28	FBXO28	2.68391	down
202273_at	platelet-derived growth factor receptor, beta polypeptide	PDGFRB	1.29293	down
202274_at	actin, gamma 2, smooth muscle, enteric	ACTG2	11.3643	down
202275_at	glucose-6-phosphate dehydrogenase	G6PD	5.984	down
202276_at	split hand/foot malformation (ectrodactyly) type 1	SHFM1	7.73345	down
202277_at	serine palmitoyltransferase, long chain base subunit 1	SPTLC1	13.0224	down
202278_s_at	serine palmitoyltransferase, long chain base subunit 1	SPTLC1	1.19843	down
202279_at	chromosome 14 open reading frame 2	C14orf2	3.2111	down
202280_at			1.78485	up
202281_at	cyclin G associated kinase	GAK	1.8903	down
202282_at	hydroxyacyl-Coenzyme A dehydrogenase, type II	HADH2	2.83987	down
202283_at	serpin peptidase inhibitor, clade F (alpha-2 antiplasmin, pigment epithelium derived factor), member 1	SERPINF1	1.18187	down
202284_s_at	cyclin-dependent kinase inhibitor 1A (p21, Cip1)	CDKN1A	3.19794	down
202285_s_at	tumor-associated calcium signal transducer 2	TACSTD2	1.05997	up
202286_s_at	tumor-associated calcium signal transducer 2	TACSTD2	36.643	down
202287_s_at	tumor-associated calcium signal transducer 2	TACSTD2	1.77751	up
202288_at	FK506 binding protein 12-rapamycin associated protein 1	FRAP1	1.03057	down
202289_s_at	transforming, acidic coiled-coil containing protein 2	TACC2	1.01112	up
202290_at	PDGFA associated protein 1	PDAP1	1.35012	down
202291_s_at	matrix Gla protein	MGP	1576.2	down
202292_x_at	lysophospholipase II /// lysophospholipase II pseudogene 1 /// similar to Acyl-protein thioesterase 2 (Lysophospholipase II) (LPL-I) /// similar to Acyl-protein thioesterase 2 (Lysophospholipase II) (LPL-I)	LYPLA2 /// LYPLA2P1 /// LOC653639 /// LOC654135	6.68546	down
202293_at	stromal antigen 1	STAG1	3.12342	down
202294_at	stromal antigen 1	STAG1	9.42387	down
202295_s_at	cathepsin H	CTSH	1.06704	up
202296_s_at	RER1 retention in endoplasmic reticulum 1 homolog (S. cerevisiae)	RER1	2.91165	down
202297_s_at	RER1 retention in endoplasmic reticulum 1 homolog (S. cerevisiae)	RER1	4.19577	down
202298_at	NADH dehydrogenase (ubiquinone) 1 alpha subcomplex, 1, 7.5kDa	NDUFA1	2.60117	down
202299_s_at	hepatitis B virus x interacting protein	HBXIP	1.3768	down
202300_at	hepatitis B virus x interacting protein	HBXIP	1.40456	down
202301_s_at	similar to splicing factor, arginine/serine-rich 4	FLJ11021	2.98295	down
202302_s_at	similar to splicing factor, arginine/serine-rich 4	FLJ11021	4.97337	down
202303_x_at	SWI/SNF related, matrix associated, actin dependent regulator of chromatin, subfamily a, member 5	SMARCA5	3.05507	down
202304_at	fibronectin type III domain containing 3A	FNDC3A	29.4717	down
202305_s_at	fasciculation and elongation protein zeta 2 (zygin II)	FEZ2	4.74372	down
202306_at	polymerase (RNA) II (DNA directed) polypeptide G	POLR2G	4.01491	down
202307_s_at	transporter 1, ATP-binding cassette, sub-family B (MDR/TAP)	TAP1	1.46567	up
202308_at	sterol regulatory element binding transcription factor 1	SREBF1	1.85232	up
202309_at	methylenetetrahydrofolate dehydrogenase (NADP+ dependent) 1, methenyltetrahydrofolate cyclohydrolase, formyltetrahydrofolate synthetase	MTHFD1	5.4367	down
202310_s_at	collagen, type I, alpha 1	COL1A1	1.10122	down
202311_s_at	collagen, type I, alpha 1	COL1A1	1.44769	up
202312_s_at	collagen, type I, alpha 1	COL1A1	1.2354	up
202313_at	protein phosphatase 2 (formerly 2A), regulatory subunit B (PR 52), alpha isoform	PPP2R2A	4.67385	down
202314_at	cytochrome P450, family 51, subfamily A, polypeptide 1	CYP51A1	3.88842	down
202315_s_at	breakpoint cluster region	BCR	1.8803	down
202316_x_at	ubiquitination factor E4B (UFD2 homolog, yeast)	UBE4B	3.39027	down
202317_s_at	ubiquitination factor E4B (UFD2 homolog, yeast)	UBE4B	1.78882	down
202318_s_at	SUMO1/sentrin specific peptidase 6	SENP6	5.4183	down
202319_at	SUMO1/sentrin specific peptidase 6	SENP6	2.56745	down
202320_at	general transcription factor IIIC, polypeptide 1, alpha 220kDa	GTF3C1	19.5676	down
202321_at	geranylgeranyl diphosphate synthase 1	GGPS1	1.68836	down
202322_s_at	geranylgeranyl diphosphate synthase 1	GGPS1	4.52378	down
202323_s_at	acyl-Coenzyme A binding domain containing 3	ACBD3	1.25344	down
202324_s_at	acyl-Coenzyme A binding domain containing 3	ACBD3	7.62782	down
202325_s_at	ATP synthase, H+ transporting, mitochondrial F0 complex, subunit F6	ATP5J	4.92856	down
202326_at	euchromatic histone-lysine N-methyltransferase 2	EHMT2	1.73664	up
202327_s_at	polycystic kidney disease 1 (autosomal dominant)	PKD1	1.28774	up
202328_s_at	polycystic kidney disease 1 (autosomal dominant)	PKD1	1.28083	down
202329_at	c-src tyrosine kinase	CSK	1.26378	down
202330_s_at	uracil-DNA glycosylase	UNG	11.9542	down
202331_at	branched chain keto acid dehydrogenase E1, alpha polypeptide	BCKDHA	2.94995	down
202332_at	casein kinase 1, epsilon	CSNK1E	1.94552	down
202333_s_at	ubiquitin-conjugating enzyme E2B (RAD6 homolog)	UBE2B	1.31013	down
202334_s_at	ubiquitin-conjugating enzyme E2B (RAD6 homolog)	UBE2B	1.78716	down
202335_s_at	ubiquitin-conjugating enzyme E2B (RAD6 homolog)	UBE2B	2.02654	down
202336_s_at	peptidylglycine alpha-amidating monooxygenase	PAM	55.9422	down
202337_at	polyamine-modulated factor 1	PMF1	3.7894	down
202338_at	thymidine kinase 1, soluble	TK1	2.14615	up
202339_at	symplekin	SYMPK	1.69559	up
202340_x_at	nuclear receptor subfamily 4, group A, member 1	NR4A1	15.3555	down
202341_s_at	tripartite motif-containing 2	TRIM2	2.71541	down
202342_s_at	tripartite motif-containing 2	TRIM2	9.26254	down
202343_x_at	cytochrome c oxidase subunit Vb	COX5B	3.90819	down
202344_at	heat shock transcription factor 1 /// similar to Heat shock factor protein 1 (HSF 1) (Heat shock transcription factor 1) (HSTF 1)	HSF1 /// LOC642269	1.6417	down
202345_s_at	fatty acid binding protein 5 (psoriasis-associated) /// similar to Fatty acid-binding protein, epidermal (E-FABP) (Psoriasis-associated fatty acid-binding protein homolog) (PA-FABP)	FABP5 /// LOC653327	10.7949	down
202346_at	huntingtin interacting protein 2	HIP2	1.21156	down
202347_s_at	huntingtin interacting protein 2	HIP2	1.35946	down
202348_s_at	torsin family 1, member A (torsin A)	TOR1A	1.03709	down
202349_at	torsin family 1, member A (torsin A)	TOR1A	1.88463	down
202350_s_at	matrilin 2	MATN2	887.229	down
202351_at	integrin, alpha V (vitronectin receptor, alpha polypeptide, antigen CD51)	ITGAV	31.4792	down
202352_s_at	proteasome (prosome, macropain) 26S subunit, non-ATPase, 12	PSMD12	2.57826	down
202353_s_at	proteasome (prosome, macropain) 26S subunit, non-ATPase, 12	PSMD12	4.95474	down
202354_s_at	general transcription factor IIF, polypeptide 1, 74kDa	GTF2F1	1.58437	up
202355_s_at	general transcription factor IIF, polypeptide 1, 74kDa	GTF2F1	1.62986	down
202356_s_at	general transcription factor IIF, polypeptide 1, 74kDa	GTF2F1	2.06718	down
202357_s_at	complement factor B	CFB	73.1247	down
202358_s_at	sorting nexin 19	SNX19	1.1199	down
202359_s_at	sorting nexin 19	SNX19	7.05358	down
202360_at	mastermind-like 1 (Drosophila)	MAML1	7.58344	down
202361_at	SEC24 related gene family, member C (S. cerevisiae)	SEC24C	3.58465	down
202362_at	RAP1A, member of RAS oncogene family	RAP1A	2.06442	down
202363_at	sparc/osteonectin, cwcv and kazal-like domains proteoglycan (testican) 1	SPOCK1	79.4234	down
202364_at	MAX interactor 1 /// MAX interactor 1	MXI1	1.83931	up
202365_at	hypothetical protein MGC5139	MGC5139	15.9206	down
202366_at	acyl-Coenzyme A dehydrogenase, C-2 to C-3 short chain	ACADS	1.20376	down
202367_at	cut-like 1, CCAAT displacement protein (Drosophila)	CUTL1	1.49712	down
202368_s_at	translocation associated membrane protein 2	TRAM2	10.5853	down
202369_s_at	translocation associated membrane protein 2	TRAM2	18.4801	down
202370_s_at	core-binding factor, beta subunit	CBFB	3.47133	down
202371_at	transcription elongation factor A (SII)-like 4	TCEAL4	38.0885	down
202372_at	Full-length cDNA clone CS0DC007YG11 of Neuroblastoma Cot 25-normalized of Homo sapiens (human)		2.04566	down
202373_s_at	RAB3 GTPase activating protein subunit 2 (non-catalytic)	RAB3GAP2	4.45931	down
202374_s_at	RAB3 GTPase activating protein subunit 2 (non-catalytic)	RAB3GAP2	1.37808	down
202375_at	SEC24 related gene family, member D (S. cerevisiae)	SEC24D	12.5432	down
202376_at	serpin peptidase inhibitor, clade A (alpha-1 antiproteinase, antitrypsin), member 3	SERPINA3	1.24455	up
202377_at			2.70329	down
202378_s_at	leptin receptor overlapping transcript	LEPROT	1.90683	down
202379_s_at	natural killer-tumor recognition sequence	NKTR	3.6173	down
202380_s_at	natural killer-tumor recognition sequence	NKTR	8.52052	down
202381_at	ADAM metallopeptidase domain 9 (meltrin gamma)	ADAM9	4.53064	down
202382_s_at	glucosamine-6-phosphate deaminase 1	GNPDA1	7.7738	down
202383_at	Smcy homolog, X-linked (mouse)	SMCX	1.171	down
202384_s_at	Treacher Collins-Franceschetti syndrome 1	TCOF1	1.33772	up
202385_s_at	Treacher Collins-Franceschetti syndrome 1	TCOF1	1.8497	down
202386_s_at	limkain b1	LKAP	3.14326	up
202387_at	BCL2-associated athanogene /// BCL2-associated athanogene	BAG1	4.29377	up
202388_at	regulator of G-protein signalling 2, 24kDa	RGS2	6.59921	down
202389_s_at	huntingtin (Huntington disease)	HD	1.06568	up
202390_s_at	huntingtin (Huntington disease)	HD	1.00381	up
202391_at	brain abundant, membrane attached signal protein 1	BASP1	3.89038	down
202392_s_at	phosphatidylserine decarboxylase	PISD	1.5507	down
202393_s_at	Kruppel-like factor 10	KLF10	10.0611	down
202394_s_at	ATP-binding cassette, sub-family F (GCN20), member 3	ABCF3	1.48059	down
202395_at	N-ethylmaleimide-sensitive factor	NSF	3.76268	down
202396_at	transcription elongation regulator 1	TCERG1	3.17066	down
202397_at	nuclear transport factor 2	NUTF2	1.7796	down
202398_at	adaptor-related protein complex 3, sigma 2 subunit	AP3S2	8.03695	down
202399_s_at	adaptor-related protein complex 3, sigma 2 subunit	AP3S2	1.23396	down
202400_s_at	serum response factor (c-fos serum response element-binding transcription factor)	SRF	1.07618	up
202401_s_at	serum response factor (c-fos serum response element-binding transcription factor)	SRF	1.03285	up
202402_s_at	cysteinyl-tRNA synthetase	CARS	1.68715	down
202403_s_at	collagen, type I, alpha 2	COL1A2	23.8904	down
202404_s_at	collagen, type I, alpha 2	COL1A2	376.916	down
202405_at	TIA1 cytotoxic granule-associated RNA binding protein-like 1	TIAL1	1.34568	down
202406_s_at	TIA1 cytotoxic granule-associated RNA binding protein-like 1	TIAL1	3.55904	down
202407_s_at	PRP31 pre-mRNA processing factor 31 homolog (S. cerevisiae)	PRPF31	2.01837	up
202408_s_at	PRP31 pre-mRNA processing factor 31 homolog (S. cerevisiae)	PRPF31	4.24799	down
202409_at	chromosome 11 open reading frame 43	C11orf43	11.1969	down
202410_x_at	insulin-like growth factor 2 (somatomedin A)	IGF2	3.54937	down
202411_at	interferon, alpha-inducible protein 27	IFI27	7.67295	down
202412_s_at	ubiquitin specific peptidase 1	USP1	2.65544	down
202413_s_at	ubiquitin specific peptidase 1	USP1	7.38393	down
202414_at	excision repair cross-complementing rodent repair deficiency, complementation group 5 (xeroderma pigmentosum, complementation group G (Cockayne syndrome))	ERCC5	2.56175	down
202415_s_at	hsp70-interacting protein	HSPBP1	1.33301	down
202416_at	DnaJ (Hsp40) homolog, subfamily C, member 7	DNAJC7	4.50939	down
202417_at	kelch-like ECH-associated protein 1	KEAP1	13.905	down
202418_at	Yip1 interacting factor homolog A (S. cerevisiae)	YIF1A	4.52161	down
202419_at	follicular lymphoma variant translocation 1	FVT1	12.2711	down
202420_s_at	DEAH (Asp-Glu-Ala-His) box polypeptide 9	DHX9	5.39962	down
202421_at	immunoglobulin superfamily, member 3	IGSF3	1.37647	up
202422_s_at	acyl-CoA synthetase long-chain family member 4	ACSL4	3.29101	down
202423_at	MYST histone acetyltransferase (monocytic leukemia) 3	MYST3	2.51725	down
202424_at	mitogen-activated protein kinase kinase 2	MAP2K2	1.64337	down
202425_x_at	protein phosphatase 3 (formerly 2B), catalytic subunit, alpha isoform (calcineurin A alpha)	PPP3CA	8.67384	down
202426_s_at	retinoid X receptor, alpha	RXRA	1.9737	up
202427_s_at	brain protein 44	BRP44	2.09712	down
202428_x_at	diazepam binding inhibitor (GABA receptor modulator, acyl-Coenzyme A binding protein)	DBI	4.381	down
202429_s_at	protein phosphatase 3 (formerly 2B), catalytic subunit, alpha isoform (calcineurin A alpha)	PPP3CA	6.12306	down
202430_s_at	phospholipid scramblase 1	PLSCR1	18.3836	down
202431_s_at	v-myc myelocytomatosis viral oncogene homolog (avian)	MYC	8.72549	down
202432_at	protein phosphatase 3 (formerly 2B), catalytic subunit, beta isoform (calcineurin A beta)	PPP3CB	1.90386	down
202433_at	solute carrier family 35, member B1	SLC35B1	4.52945	down
202434_s_at	cytochrome P450, family 1, subfamily B, polypeptide 1	CYP1B1	4.20392	up
202435_s_at	cytochrome P450, family 1, subfamily B, polypeptide 1	CYP1B1	55.2381	down
202436_s_at	cytochrome P450, family 1, subfamily B, polypeptide 1	CYP1B1	17.5001	down
202437_s_at	cytochrome P450, family 1, subfamily B, polypeptide 1	CYP1B1	27.4905	down
202438_x_at	iduronate 2-sulfatase (Hunter syndrome)	IDS	2.06678	down
202439_s_at	iduronate 2-sulfatase (Hunter syndrome)	IDS	1.55707	down
202440_s_at	suppression of tumorigenicity 5	ST5	1.84432	down
202441_at	SPFH domain family, member 1	SPFH1	15.5527	down
202442_at	adaptor-related protein complex 3, sigma 1 subunit	AP3S1	7.24353	down
202443_x_at	Notch homolog 2 (Drosophila)	NOTCH2	1.91894	down
202444_s_at	SPFH domain family, member 1	SPFH1	2.18334	up
202445_s_at	Notch homolog 2 (Drosophila)	NOTCH2	1.18068	up
202446_s_at	phospholipid scramblase 1	PLSCR1	8.68438	down
202447_at	2,4-dienoyl CoA reductase 1, mitochondrial	DECR1	2.61167	down
202448_s_at	zyg-11 homolog B (C. elegans)-like	ZYG11BL	1.99776	up
202449_s_at	retinoid X receptor, alpha	RXRA	1.31459	down
202450_s_at	cathepsin K (pycnodysostosis)	CTSK	28.4131	down
202451_at	general transcription factor IIH, polypeptide 1, 62kDa	GTF2H1	10.9179	down
202452_at	zyg-11 homolog B (C. elegans)-like	ZYG11BL	2.22917	up
202453_s_at	general transcription factor IIH, polypeptide 1, 62kDa	GTF2H1	1.24344	up
202454_s_at	v-erb-b2 erythroblastic leukemia viral oncogene homolog 3 (avian)	ERBB3	1.62469	up
202455_at	histone deacetylase 5	HDAC5	1.03126	up
202456_s_at	zyg-11 homolog B (C. elegans)-like	ZYG11BL	2.45745	up
202457_s_at	protein phosphatase 3 (formerly 2B), catalytic subunit, alpha isoform (calcineurin A alpha)	PPP3CA	4.90654	down
202458_at	protease, serine, 23	PRSS23	2.624	down
202459_s_at	lipin 2	LPIN2	1.76995	up
202460_s_at	lipin 2	LPIN2	1.18298	up
202461_at	eukaryotic translation initiation factor 2B, subunit 2 beta, 39kDa	EIF2B2	2.52575	down
202462_s_at	DEAD (Asp-Glu-Ala-Asp) box polypeptide 46	DDX46	4.93888	down
202463_s_at	methyl-CpG binding domain protein 3	MBD3	1.00805	down
202464_s_at	6-phosphofructo-2-kinase/fructose-2,6-biphosphatase 3	PFKFB3	4.88318	down
202465_at	procollagen C-endopeptidase enhancer	PCOLCE	8.04081	down
202466_at	polymerase (DNA directed) sigma	POLS	2.68153	down
202467_s_at	COP9 constitutive photomorphogenic homolog subunit 2 (Arabidopsis)	COPS2	6.96615	down
202468_s_at	catenin (cadherin-associated protein), alpha-like 1	CTNNAL1	2.89349	down
202469_s_at	cleavage and polyadenylation specific factor 6, 68kDa	CPSF6	2.51565	down
202470_s_at	cleavage and polyadenylation specific factor 6, 68kDa	CPSF6	1.70112	down
[truncated: 20,279 more rows]
